# Magnetoencephalography-based interpretable automated differential diagnosis in neurodegenerative diseases

Klepachevskiy D<sup>1,2</sup>, Romano A<sup>3</sup>, Aristimunha B<sup>4,5</sup>, Angiolelli M<sup>6</sup>, Trojsi F<sup>7</sup>, Bonavita S<sup>7</sup>, Sorrentino G<sup>8,9,10</sup>, Andreone V<sup>11</sup>, Minino R<sup>3</sup>, Troisi Lopez E<sup>9</sup>, Polverino A<sup>10</sup>, Jirsa V<sup>2</sup>, Saudargienė A<sup>1</sup>, Corsi M.-C.<sup>12\*</sup>, Sorrentino P<sup>2,9,13\*</sup>

1. Neuroscience Institute, Lithuanian University of Health Sciences, Kaunas, Lithuania
2. Institut de Neurosciences des Systèmes, Aix-Marseille Université, 13005 Marseille, France
3. Department of Medical Motor and Wellness Sciences, University of Naples “Parthenope”, Naples, Italy
4. Université Paris-Saclay, Inria TAU, LISN-CNRS, France
5. Universidade Federal do ABC, Santo André, Brazil
6. Department of Engineering, Università Campus Bio-Medico di Roma, Rome, Italy
7. Department of Advanced Medical and Surgical Sciences, University of Campania “Luigi Vanvitelli”, Naples, Italy
8. Department of Economic, Legal, Informatics and Motor Sciences, University of Naples Parthenope, Nola, Italy
9. Institute of Applied Sciences and Intelligent Systems, National Research Council, Pozzuoli, Italy
10. ICS Maugeri Hermitage Napoli, Via Miano 69 - 80145
11. Department of Neurology, Cardarelli Hospital, Naples, Italy
12. Sorbonne Université, Institut du Cerveau – Paris Brain Institute -ICM, CNRS, Inria, Inserm, AP-HP, Hôpital de la Pitié Salpêtrière, F-75013, Paris, France
13. University of Sassari, Department of Biomedical Sciences, Viale San Pietro, 07100, Sassari, Italy

\*These authors supervised equally

† Correspondance to: [pierpaolo.SORRENTINO@univ-amu.fr](mailto:pierpaolo.SORRENTINO@univ-amu.fr)

## Abstract

Automating the diagnostic process steps has been of interest for research grounds and to help manage the healthcare systems. Improved classification accuracies, provided by ever more sophisticated algorithms, were mirrored by the loss of interpretability on the criteria for achieving accuracy. In other words, the mechanisms responsible for generating the distinguishing features are typically not investigated. Furthermore, the vast majority of the classification studies focus on the classification of one disease as opposed to matched controls. While this scenario has internal validity, concerning the appropriateness toward answering scientific questions, it does not have external validity. In other words, differentiating multiple diseases at once is a classification problem closer to many real-world scenarios. In

NOTE: This preprint reports new research that has not been certified by peer review and should not be used to guide clinical practice.

49 this work, we test the hypothesis that specific data features hold most of the discriminative  
50 power across multiple neurodegenerative diseases. Furthermore, we perform an explorative  
51 analysis to compare metrics based on different assumptions (concerning the underlying  
52 mechanisms). To test this hypothesis, we leverage a large Magnetoencephalography dataset  
53 (N=109) merging four cohorts, recorded in the same clinical setting, of patients affected by  
54 multiple sclerosis, amyotrophic lateral sclerosis, Parkinson's disease, and mild cognitive  
55 impairment. Our results show that it is possible to reach a balanced accuracy of 67,1% (chance  
56 level = 35%), based on a small set of (non-disease specific) features. We show that edge  
57 metrics (defined as statistical dependencies between pairs of brain signals) perform better  
58 than nodal metrics (considering region while disregarding the interactions. Moreover, phase-  
59 based metrics slightly outperform amplitude-based metrics. In conclusion, our work shows that  
60 a small set of phase-based connectivity metrics applied to MEG data successfully  
61 distinguishes across multiple neurological diseases.

62

63

## 64 Introduction

65

66 In the last twenty-five years, the widespread availability of large-scale brain functional data in  
67 health and disease has brought great hope toward discovering the mechanisms underpinning  
68 brain diseases and the appearance of neurological symptoms. Cognitive functions emerge  
69 from the coordinated interactions among brain regions, manifesting as statistical  
70 dependencies among the corresponding brain signals. The overall statistical dependencies  
71 between all pairs of signals are often referred to as “functional connectivity” (Friston, 1994).  
72 Functional connectivity (FC) is subject-specific and allows subject identification (Finn &  
73 Rosenberg, 2021), is altered during the execution of tasks (Corsi et al., 2020), in different  
74 environmental conditions (Shine et al., 2016), as well as in neurological diseases (Sorrentino  
75 et al., n.d., 2018, 2019). The commonest and most straightforward approach to assessing  
76 statistical dependencies has been using descriptive metrics (e.g., Pearson’s correlation). This  
77 approach has no underlying assumptions concerning the mechanism underlying the observed  
78 statistical dependencies. Other techniques take a more mechanisms-driven approach. As an  
79 example, the hypothesis of communication through coherence posits that the occurrence of  
80 communication between regions might occur via more or less synchronization (Fries, 2015).  
81 Then, metrics such as the Phase Locking value (PLV) were developed to quantify  
82 communication via the synchronization between brain signals (such as  
83 electroencephalography-EEG and magnetoencephalography-MEG) (Bastos & Schoffelen,  
84 2016). These metrics have been classically used to characterize multiple neurodegenerative  
85 diseases (Stam, 2010). More recently, it was shown that large-scale brain activity is far from  
86 stationary, and instead, it is characterized by aperiodic, scale-free bursts of activity (Haldeman  
87 & Beggs, 2005; Shriki et al., 2013; Tagliazucchi et al., 2012). Then, borrowing from statistical  
88 mechanics, the dependencies among brain regions were understood as the presence of scale-  
89 free bursts of activities, named “*neuronal avalanches*”, that describe the presence of aperiodic,  
90 non-linear bursts of activities spreading brain regions. Intriguingly, in several neurological  
91 diseases (such as Parkinson’s disease, Amyotrophic lateral sclerosis, and Mild Cognitive  
92 Impairment), brain dynamics spread differently with respect to healthy controls (Polverino et  
93 al., 2024; Romano et al., 2023; Sorrentino et al., 2019), and, more importantly, changes in the  
94 way aperiodic waves spread proved to be strongly predictive of individual clinical disability  
95 (Polverino et al., 2024; Romano et al., 2023).

96 Despite extensive efforts, there has been a lack of replicability of the studies, regardless of  
97 the particular technique adopted to estimate functional connectivity (Kelly & Hoptman, 2022).  
98 In other words, the measurements and metrics devised to this day might fail to optimally  
99 capture disease-relevant mechanisms comprehensively. As a consequence, automatic

100 classification among multiple neurological diseases cannot be achieved with high accuracy  
101 based on functional data alone.

102 In this paper, we take a different approach and start from the assumption that the way  
103 pathophysiological processes spread across the brain has some aspects to it that are specific  
104 to a given disease and can be best measured in a set of features that are (spatially) shared  
105 among multiple diseases. As a direct consequence, functional connectivity should show  
106 specific elements that distinguish various diseases. Hence, the first hypothesis of our study is  
107 that it is possible to identify a (small) set of features that can classify multiple neurological  
108 diseases.

109 To test our hypothesis, we leveraged a vast cohort of source-reconstructed MEG data from  
110 patients affected by mild cognitive impairment (MCI), amyotrophic lateral sclerosis (ALS),  
111 Parkinson's disease (PD), and Multiple Sclerosis (MS).

112 First, we compared the classification performance of four FC metrics that capture different  
113 properties of the signals (AEC, PLV, Pearson's correlation coefficient, and ATM) associated  
114 with a four-class problem (i.e. MCI, PD, MS, and ALS). We considered the features that can  
115 differentiate the considered neurological diseases for each FC metric taken separately.

116 Furthermore, we compared nodal and edge metrics, under the hypothesis that edges, which  
117 more directly represented the interactions among brain regions, would outperform local (i.e.)  
118 metrics. We compared the classification performance using three different machine learning  
119 algorithms (i.e., XGBoost, Support Vector Machine (SVM), and Linear Discriminant Analysis  
120 (LDA), to demonstrate that the performance of a given feature-set is algorithm-independent.

121 Finally, for each FC metric, we identified the most informative features used by the classifier,  
122 under the hypothesis that such relevant features were linked to the neurophysiology of the  
123 considered neurological diseases. Such a study would make the classification results more  
124 interpretable and would enable us to identify clusters of brain interactions sensitive to the  
125 neurophysiological mechanisms associated with the considered diseases.

126 The purpose of this work is to explore a diverse set of connectivity metrics to propose an  
127 interpretable automated pipeline for differentiated diagnosis of neurodegenerative diseases.

128

## 129 1. Materials and Methods

### 130 2.1 Participants

131

132 One hundred nine patients with different neurological diseases (ALS, MCI, PD, MS) were  
133 recruited from Hermitage Capodimonte Clinic in Naples (Polverino et al., 2022; Romano et al.,  
134 2023; Sorrentino et al., 2019, 2022). Specifically, Thirty-two MCI patients (18 males and 14

135 females; mean age 71.31; SD  $\pm$  6.83; mean education 10.54; SD  $\pm$  4.33) were recruited from  
136 the Center of Cognitive and Memory Disorders of the Hermitage Capodimonte Clinic in  
137 Naples, Italy. The MCI diagnosis was done according to the National Institute on Ageing-  
138 Alzheimer's Association criteria (Albert et al., 2011). Thirty-nine ALS patients (29 males and  
139 10 females; mean age 59.63; SD  $\pm$  12.87; mean education 10.38 years SD  $\pm$  4.3) were  
140 selected in collaboration with the ALS Center of the First Division of Neurology of the University  
141 of Campania "Luigi Vanvitelli" (Naples, Italy). The ALS diagnosis was performed according to  
142 the El-Escorial criteria (Brooks, 1994). Twenty patients (14 males and 6 females; mean age  
143 64.5; SD  $\pm$  12.18; mean education 11 years SD  $\pm$  3.9) with a confirmed diagnosis of  
144 Parkinson's disease according to the United Kingdom Parkinson's Disease Brain Bank criteria  
145 (Gibb & Lees, 1988) were recruited in collaboration with the Movement Disorder Unit of  
146 Cardarelli hospital in Naples. Finally, eighteen patients (6 males and 12 females; mean age  
147 45.05; SD  $\pm$  9.92; mean education 14-11 years SD  $\pm$  4.89) with Multiple Sclerosis were  
148 recruited in collaboration with University of Campania Luigi Vanvitelli. The diagnosis was  
149 performed following the 2017 revision of the McDonald criteria (Thompson et al., 2018). Each  
150 participant underwent a specific motor and/or neuropsychological evaluation according to the  
151 clinical characteristics of each disease. A complete summary of the cohort description is  
152 available in Table 1. The study protocol was approved by the "Comitato Etico Campania  
153 Centro" (Prot.n.93C.E./Reg. n.14-17OSS) and all participants provided written informed  
154 consent in accordance with the Declaration of Helsinki.

155  
156

| <i>Type of disease</i>                     | <i>Number of participants (109)</i> | <i>Age (mean <math>\pm</math> SD)</i> | <i>Years of education (mean <math>\pm</math> SD)</i> | <i>Gender (ratio)</i> |
|--------------------------------------------|-------------------------------------|---------------------------------------|------------------------------------------------------|-----------------------|
| <i>Mild Cognitive Impairment (MCI)</i>     | 32                                  | 71.31<br>(SD $\pm$ 6.83)              | 10.54<br>(SD $\pm$ 4.33)                             | 18 m / 14 f           |
| <i>Multiple Sclerosis (MS)</i>             | 18                                  | 45.05<br>(SD $\pm$ 9.92)              | 14.11<br>(SD $\pm$ 4.89)                             | 6m /12 f              |
| <i>Parkinson's Disease (PD)</i>            | 20                                  | 64.5<br>(SD $\pm$ 12.18)              | 11<br>(SD $\pm$ 3.9)                                 | 14 m / 6 f            |
| <i>Amyotrophic Lateral Sclerosis (ALS)</i> | 39                                  | 59.63<br>(SD $\pm$ 12.87)             | 10.38<br>(SD $\pm$ 4.3)                              | 29 m/10 f             |

157 **Table 1: Demographic features of the cohort:** m: males; f: females; SD: Standard  
158 Deviation

159

## 160 2.2 MEG and MRI acquisition, pre-processing, and source reconstruction

161

162 MEG and MRI acquisition, preprocessing, and source reconstruction were performed similarly  
163 to previous studies (Cipriano et al., 2024, p. 20; Romano et al., 2022). Briefly, all patients  
164 underwent an MRI scan using a 3T Biograph mMR tomograph (Siemens Healthcare Erlangen,  
165 Germany) equipped with a 12 channels head coil. Specifically, 3 dimensional T1-weighted  
166 images (gradient-echo sequence inversion recovery prepared fast spoiled gradient recalled-  
167 echo, time repetition = 6,988 ms, inversion time = 1,100 ms, echo time = 3.9 ms, flip angle =  
168 10, voxel size = 1 × 1 × 1.2 mm<sup>3</sup>) were acquired. The MEG acquisition was performed using  
169 a 163-magnetometer system placed in a magnetically shielded room (AtB Biomag UG, Ulm,  
170 Germany). Fastrack (Polhemus®) was used to define the position of the head under the  
171 helmet and to digitalize the position of four anatomical landmarks (nasion, right, and left  
172 preauricular and apex) and four reference coils. Each patient performed two recordings of 3.5  
173 minutes each, with a one-minute break, during a resting state, with eyes closed.  
174 Electrocardiographic and electrooculographic signals were recorded to remove physiological  
175 artifacts. Data were acquired with a sampling frequency of 1024 Hz. A Principal component  
176 analysis (PCA) was used to reduce the environmental noise, and an independent component  
177 analysis (ICA) was used to remove physiological artifacts (namely ocular and cardiac  
178 artifacts). Finally, to obtain the source-reconstructed time series of the patients, according to  
179 the Automated Anatomical Labeling (AAL) atlas, we used a beamformer algorithm and the  
180 volume conduction model proposed by Nolte (Nolte, 2003). The time series were filtered  
181 between 0.5 and 48 Hz.

## 182 2.3 Connectivity Metrics

183

### 184 *Phase Locking Value (PLV)*

185

186 The PLV measures the phase synchronization between two narrowband signals, and it is  
187 computed as : (Lachaux et al., 1999).

$$188 \quad PLV = |E [ e^{j\Delta\Phi_{xy}(t)} ]|,$$

189

190 where  $\Delta\Phi_{xy}(t)$  represents the difference between  $\Phi_x(t) - \Phi_y(t)$ ,  $[E]$  is the statistical  
191 expectation, and  $\Delta\Phi_{x,y}(t)$  are the instantaneous phases of the analytical signals.

192

### 193 *Correlation Coefficient (CC)*

194

195 We computed Pearson's correlation coefficient to estimate the pairwise synchronization  
196 between signals of different brain regions.

197

### 198 *Avalanche Transition Matrix (ATM)*

199

200 The ATM describes the probability that after the activation of region  $i$  at the time  $t$ , the region  
201  $j$  will be active at the time  $t + \delta$  (Sorrentino et al., 2021). The ATMs are computed starting from  
202 neuronal avalanches, which are defined as events that start when at least one region is above  
203 the threshold and end when all the regions return to their baseline activity. Hence, there is one  
204 ATM for each avalanche. More specifically, the ATM contains, in the  $ij$ th position, the  
205 probability that region  $j$  is active at time  $t+1$  given that region  $i$  is active at time  $t$ . ATMs were  
206 then averaged element-wise over all the avalanches for a subject, and finally symmetrized.

207

208

209 *Amplitude Envelope Correlation (AEC)*

210

211 The amplitude envelope is used to estimate the statistical interdependencies between brain  
212 regions. It is computed as the correlation coefficient between the analytical amplitude of two  
213 signals. High values of amplitude correlation between the envelopes indicate that two brain  
214 regions display a coordinated behavior (Brookes et al., 2011, 2012).

215

216 *Nodal analysis*

217

218 Each of the connectivity metrics yields an adjacency matrix. We have compared directly a  
219 subset of the entries of the matrices (see section 3.2), that is “edge-metrics” or nodal metrics.  
220 Three different edge-specific metrics were used: betweenness centrality, eigenvector  
221 centrality, and the degree. Betweenness centrality is a centrality measure that is equal to the  
222 number of the shortest paths passing through a given node. Another centrality measure is  
223 eigenvector centrality, which determines a node's relative importance within a network. Lastly,  
224 the degree of a node is the sum of the weights of the edges incident upon the node.

225

## 226 2.4 Classification Algorithms

227

228 To evaluate the discriminative ability of different feature sets (PLV, CC, ATM, AEC) and  
229 compare them with each other, we applied three different Machine Learning (ML) algorithms.  
230 Balanced accuracy was used as an evaluation metric, since we have imbalanced classes. ML  
231 algorithms include Linear Discriminant Analysis (LDA), Support Vector Machines (SVM), and  
232 Extreme Gradient Boosting (XGBoost). The general modelling workflow is summarized in Fig.

233 1

234

235 *Linear Discriminant Analysis*

236

237 LDA is a widely used approach for solving multi-class classification problems. The algorithm  
238 separates multiple classes (in our study - 4 classes) with multiple features through a data  
239 dimensionality reduction approach. LDA aims to find a hyperplane that best separates the  
240 classes while minimizing the overlap within each class. Related work has revealed that LDA  
241 performs well with multiclass diagnosis problems (Lin et al., 2021).

242

243

244

245

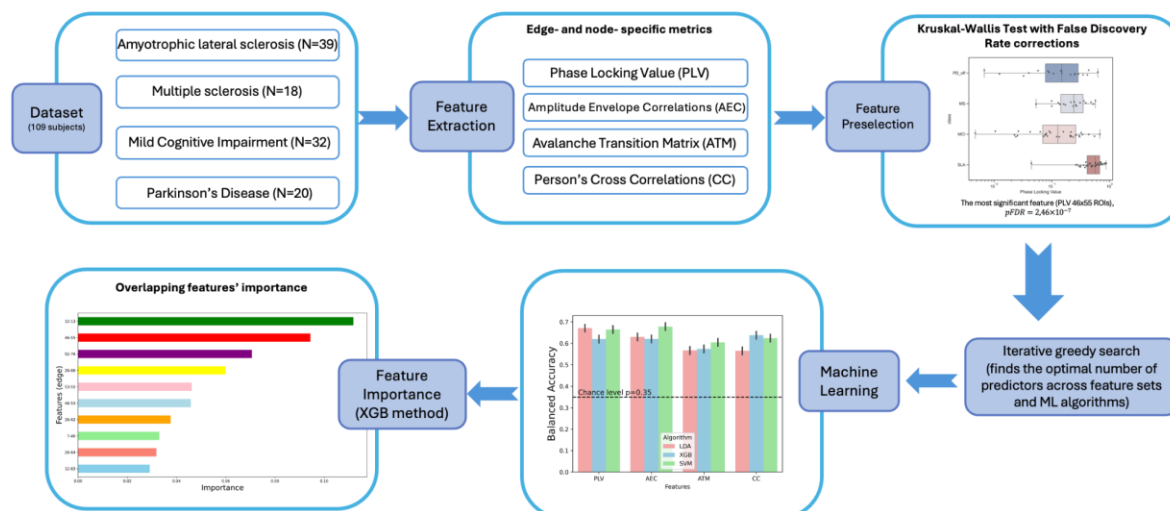

Figure 1 The general workflow of modeling

246  
247

248

249 *Support Vector Machines*

250

251 SVM is another widely used technique for solving supervised tasks with multiple classes.  
252 Several studies identified SVM as an outstanding algorithm for solving tasks with multiple  
253 classes (Maqsood et al., 2022). SVM performs complex data transformations (according to  
254 the selected kernel function) and maximizes the separation boundaries between the data  
255 points depending on the classes.

256

257 *Extreme Gradient Boosting*

258

259 Recent studies showed that XGBoost is a state-of-the-art tree-based machine learning model  
260 that outperforms many other algorithms, including deep learning models (Grinsztajn et al.,  
261 2022). Moreover, the XGBoost algorithm provides an assessment of the relative importance  
262 of individual predictors, which allows us to interpret our findings (Manju et al., n.d.)

263 XGBoost is an ensemble method that builds a predictive model by combining predictions of  
264 multiple individual decision trees. It uses weak learner trees, these are decision trees with a  
265 single split, called decision stumps. The algorithm works by sequentially adding weak learners  
266 to the ensemble, with each new learner focusing on correcting the errors made by the previous  
267 one.

268 XGBoost is known for its high accuracy and has been shown to outperform other machine  
269 learning algorithms in many predictive modeling tasks. In addition, it is highly scalable and can  
270 handle large datasets.

271

272 *2.5 Statistical Analysis*

273

274 *Kruskal-Wallis test*

275

276 For each connectivity metric taken separately, to identify the most statistically significant  
277 different features among the four groups (PD, MCI, SLA, MS) to be considered for the



278 classification, we used the Kruskal-Wallis test. Since the brain is a non-linear dynamic system,  
279 we relied on a non-parametric statistical test, checking the null hypothesis that two or more  
280 independent groups were drawn from the same underlying distribution. The same approach  
281 was used for both edge and nodal metrics.

282

### 283 *Multiple comparison correction*

284

285 Since we have numerous features to be considered for a given FC metric, we used the false  
286 discovery rate to correct for inflated significance. The False Discovery Rate (FDR) is used to  
287 control the expected proportion of false positives. The FDR is the expected ratio of the number  
288 of false positive classifications, or false “discoveries”, to the total number of positive  
289 classifications (rejections of the null hypothesis). The p-values of the Kruskal-Wallis test were  
290 corrected accordingly. Finally, we sorted the features according to the corrected p-values in  
291 ascending order.

292

### 293 *Spearman Correlation*

294 We used Spearman correlation to evaluate the correlation between the features’ ranks.  
295 Spearman’s rank correlation coefficient is a non-parametric measure of statistical dependence  
296 between two variables. This way, we evaluated the relation between the ranks of the nodal or  
297 edge features across different FC metrics (PLV, AEC, ATM).

298

### 299 *Repeated Stratified K-fold splits*

300

301 To get valid results and avoid overfitting, we applied Repeated Stratified K-fold cross-  
302 validation, which repeats k-folds n times with different randomization for each repetition (J.-H.  
303 Kim, 2009). Then, for each fold, we have pooled our results across multiple randomization.  
304 First, our whole dataset was split into two parts. For the first part, we use Stratified K-folds  
305 cross-validation to tune hyperparameters and find an optimal set that gives the best result.  
306 After tuning the hyperparameters on the first part of the dataset, then we used Stratified K-fold  
307 cross-validation 10 times for the second part. Then, accuracies obtained by each set are  
308 averaged. This way, we prevent data leakage, and it helps to get a more robust estimation of  
309 the accuracy by averaging over all repetitions and all folds. We used 10 repetitions of 10-fold  
310 cross-validations, and therefore we ensure that our evaluation is not affected by the specific  
311 choice of the validation set.

## 312 2.7 Evaluation metrics

313

### 314 *Balanced accuracy*

315

316 We used balanced accuracy as an evaluation metric for the classification algorithms since our  
317 dataset is imbalanced (NALS=39, NMCI=32, NPD=20, NMS=18) . The balanced accuracy is  
318 calculated by taking the average of the recalls obtained in each class (Thölke et al., 2023).

319

320

### 321 *Recall*

322

323 Recall is an evaluation metric that measures how often a classification algorithm correctly  
324 identifies positive instances among all the actual positive samples in the dataset.

325

$$326 \quad \text{Recall} = \frac{\text{True Positive}}{\text{True Positive} + \text{False Positive}}$$

327

328 *Receiver Operating Characteristic (ROC) curve*

329

330 ROC curve is a graph that displays the performance of a binary classification algorithm of  
331 predicting a positive class at all possible thresholds. The lower the classification threshold, the  
332 more observations are successfully classified. ROC curve uses False Positive Rate on the x-  
333 axis and True Positive Rate on its y-axis.

334 The area under the ROC curve (AUC) is an evaluation measure that measures the area  
335 underneath the ROC curve, and its maximum possible value equals one. In this manuscript,  
336 we compute the ROC curve for each class separately.

337

338 *Confusion Matrix*

339

340 A confusion matrix is an N x N matrix, where N is the number of classes. It has the true labels  
341 on the rows and the predicted labels on the second axis. This way, a confusion matrix shows  
342 how many times each class was classified correctly and also how often it was misclassified  
343 (and how).

344 We used a confusion matrix for 4 classes, therefore we have a 4 x 4 matrix, where  $TP_i$   
345 represents the observations that were correctly classified for class  $i$ , and  $E_{ij}$  represents where  
346 true class  $j$  was misclassified with predicted class  $i$ . After that, we took the relative  
347 percentages across columns to see the whole picture in percentages, therefore each column's  
348 values will sum up to 100%. This is done by dividing each element of each column by the sum  
349 of all elements of that column and multiplying by 100. For example, for column 4 and its third  
350 element, it is done as follows:

$$351 \quad \frac{E_{43}}{(E_{41} + E_{42} + E_{43} + TP_4)} \times 100$$

352

353

354

355

356 *Code availability*

357

358 The code used to perform the analysis of this study is publicly available at  
359 [https://github.com/dklpp/multiclass\\_meg\\_features\\_analysis](https://github.com/dklpp/multiclass_meg_features_analysis)

360

361

## 362 2. Results

363

### 364 3.1 Kruskal-Wallis Test

365

366 Each adjacency matrix obtained from a given FC metric (namely PLV, AEC, ATM, or CC) is  
367 a square matrix with the dimension of  $n_{regions} \times n_{regions}$ , where  $n_{regions}$  is equal to 116  
368 regions of interest. All matrices are symmetric and contain ones on the main diagonal., Hence,  
369 we take the triangular matrix, excluding the main diagonal elements, leading to 6670 edge-  
370 wise features. Given the high dimensionality of the feature space, we identified the most  
371 statistically significant different features among the four groups to be considered for the  
372 classification.

373 A non-parametric statistical Kruskal-Wallis test was performed for each feature to compare  
374 the four independent groups (PD, SLA, MS, MCI). After applying Kruskal-Wallis Test and False  
375 Discovery Rate correction, we found that there were more than 120 statistically significant  
376 edge features ( $pFDR < 0.002$ ) for each of the 4 edge-specific FC metrics. The lowest corrected  
377 with FDR p-value  $p < 0.0001$  ( $pFDR = 2,46 \times 10^{-7}$ ) was obtained with the edge-wise PLV  
378 metric between the right frontal superior gyrus and the right postcentral gyrus (see Fig 2)  
379

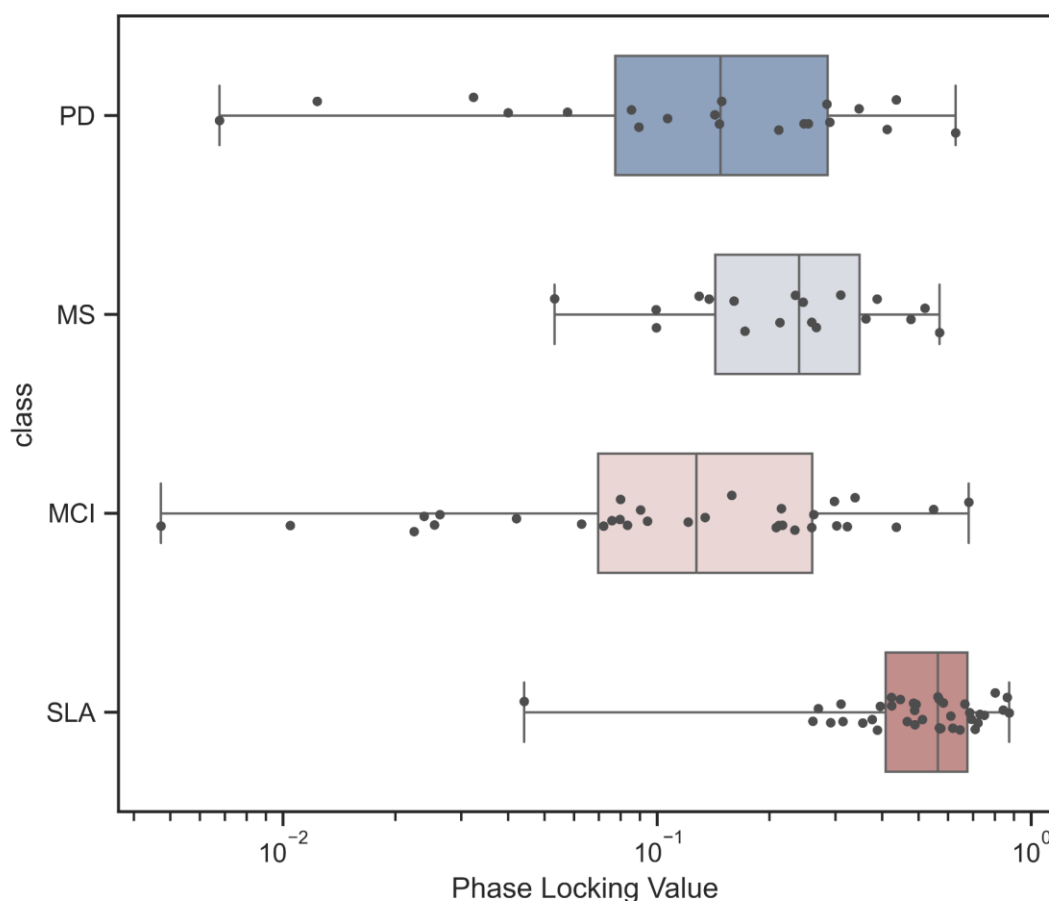

380

381 *Figure 2 The most significant features' (PLV values between the right frontal superior gyrus and the right postcentral*  
382 *gyrus) boxplots with the observations for 4 classes with FDR p-value ( $pFDR = 2,46 \times 10^{-7}$ )*

383

### 384 3.2 Classification algorithms

385

386 Based on the significant edges, we have then classified the participants. We used a  
 387 consecutive iterative search technique, starting with the 15 best features (according to their  
 388 corrected p-values), and sequentially added features and compared the accuracies, and this  
 389 procedure was repeated until 39 features were fed to the classifier (Table 2). Stability had  
 390 been reached at this point, and further increasing the number of features led to a slight  
 391 worsening of the performance (not shown). Furthermore, given the relatively small size of our  
 392 sample, we kept a lower number of features to reduce overfitting.

393

394

395

| Num pred                  | n=15         | n=16         | n=18         | n=22         | n=25         | n=28         | n=30         | n=31         | n=34         | n=36         | n=38         | n=39         |
|---------------------------|--------------|--------------|--------------|--------------|--------------|--------------|--------------|--------------|--------------|--------------|--------------|--------------|
| Metrics                   |              |              |              |              |              |              |              |              |              |              |              |              |
| <i>Edge metrics</i>       |              |              |              |              |              |              |              |              |              |              |              |              |
| <b>PLV</b>                | 0.643        | 0.629        | 0.639        | 0.611        | 0.647        | 0.653        | 0.639        | 0.631        | <b>0.671</b> | 0.651        | 0.627        | 0.635        |
| <b>AEC</b>                | 0.568        | 0.588        | 0.584        | 0.605        | 0.611        | 0.614        | 0.613        | 0.610        | 0.581        | 0.604        | <b>0.630</b> | 0.608        |
| <b>ATM</b>                | <b>0.567</b> | 0.554        | 0.520        | 0.514        | 0.470        | 0.515        | 0.529        | 0.500        | 0.504        | 0.512        | 0.514        | 0.517        |
| <b>CC</b>                 | 0.466        | 0.477        | 0.521        | 0.511        | 0.495        | 0.539        | <b>0.565</b> | 0.560        | 0.556        | 0.545        | 0.529        | 0.525        |
| <i>Nodal metrics</i>      |              |              |              |              |              |              |              |              |              |              |              |              |
| <b>AEC (eign. centr.)</b> | 0.481        | 0.478        | 0.491        | 0.468        | 0.468        | 0.459        | 0.434        | <b>0.492</b> | 0.454        | 0.446        | 0.418        | 0.399        |
| <b>AEC (betw. centr.)</b> | 0.358        | 0.345        | 0.350        | <b>0.381</b> | 0.362        | 0.312        | 0.329        | 0.334        | 0.314        | 0.333        | 0.341        | 0.348        |
| <b>AEC (degree)</b>       | 0.293        | 0.286        | 0.296        | 0.311        | <b>0.366</b> | 0.313        | 0.321        | 0.315        | 0.337        | 0.330        | 0.356        | 0.348        |
| <b>PLV (degree)</b>       | <b>0.407</b> | 0.389        | 0.376        | 0.345        | 0.377        | 0.347        | 0.321        | 0.312        | 0.311        | 0.302        | 0.323        | 0.317        |
| <b>PLV (betw. centr.)</b> | 0.436        | <b>0.454</b> | 0.443        | 0.392        | 0.401        | 0.384        | 0.371        | 0.384        | 0.373        | 0.372        | 0.345        | 0.363        |
| <b>PLV (eign. centr.)</b> | 0.350        | 0.354        | 0.346        | 0.384        | 0.414        | 0.408        | 0.387        | 0.378        | 0.436        | <b>0.443</b> | 0.435        | 0.432        |
| <b>ATM (eign. centr.)</b> | 0.479        | 0.475        | <b>0.489</b> | 0.475        | 0.460        | 0.454        | 0.438        | 0.480        | 0.431        | 0.427        | 0.409        | 0.403        |
| <b>ATM (betw. centr.)</b> | 0.358        | 0.350        | 0.350        | <b>0.381</b> | 0.362        | 0.312        | 0.329        | 0.334        | 0.314        | 0.333        | 0.341        | 0.349        |
| <b>ATM (degree)</b>       | 0.251        | 0.251        | 0.263        | 0.289        | 0.302        | 0.276        | 0.279        | 0.269        | 0.289        | 0.274        | 0.308        | <b>0.317</b> |
| <b>CC (betw. centr.)</b>  | 0.506        | <b>0.532</b> | 0.512        | 0.530        | 0.523        | 0.486        | 0.468        | 0.447        | 0.452        | 0.468        | 0.452        | 0.453        |
| <b>CC (degree)</b>        | 0.396        | 0.389        | 0.396        | 0.447        | 0.446        | <b>0.478</b> | 0.455        | 0.443        | 0.421        | 0.399        | 0.421        | 0.417        |

396

397 Table 2: *Balanced accuracy for the number of features which contain the best accuracy across different*  
 398 *metrics (PLV, AEC, ATM, CC). For visual purposes, it is demonstrated only with the LDA algorithm. The*  
 399 *accuracies obtained with the XGBoost and the SVM algorithms are in the supplementary material (see*  
 400 *S4 and S5).*

401  
402  
403  
404  
405

We decided to display the balanced accuracies for each FC metric taken separately (both edge-based and node-based metrics) to see a clearer picture of different sets' performances (Fig 3).

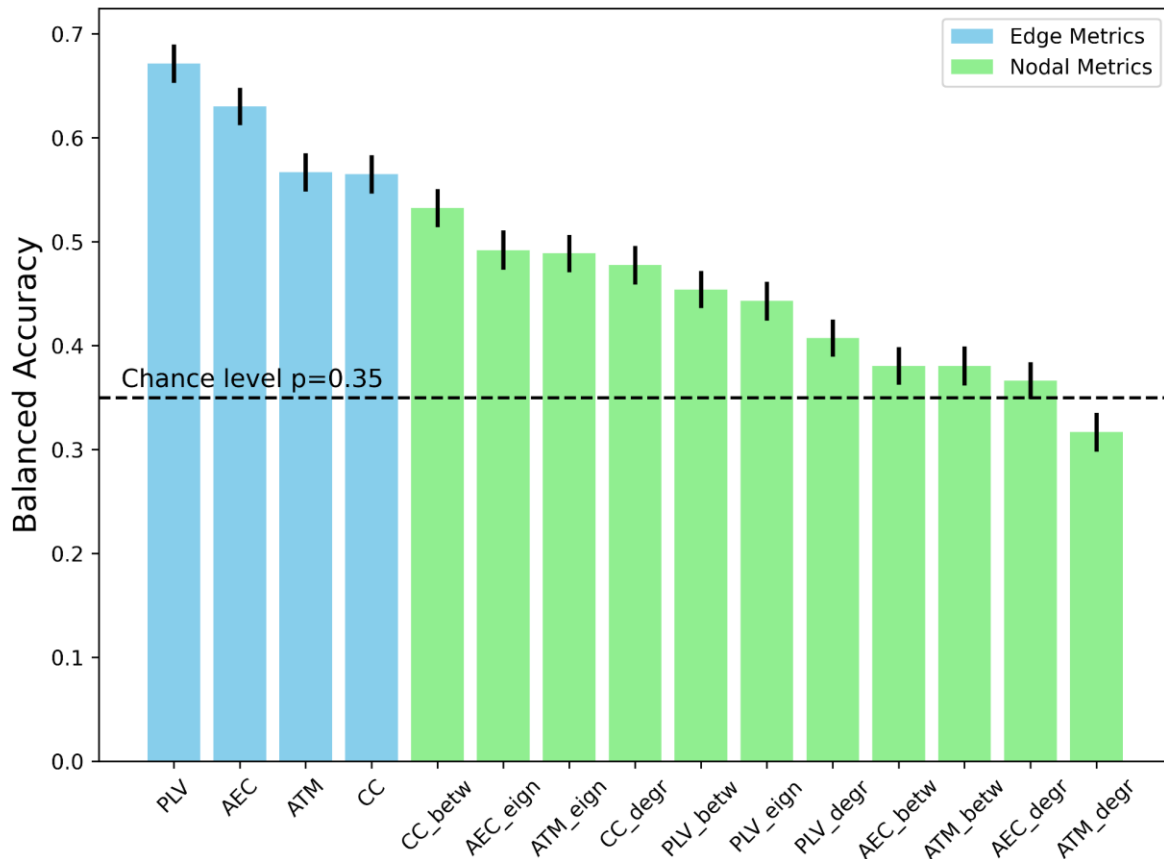

406  
407  
408  
409  
410

Figure 3 The balanced accuracies for all feature sets with LDA classifier. Each bar plot displays the averaged accuracy with its standard errors. The boxplots for other algorithms are available in the supplementary material (Fig S1-S2).

411  
412  
413  
414  
415  
416  
417  
418  
419  
420  
421  
422  
423  
424  
425

As shown in Fig3, we observed that all edge metrics consistently outperformed nodal metrics. Consistently, we observed that the standard deviations (over different repetitions of the K-folds) were higher for nodal metrics. Note that the results refer to the best-performing feature selection (i.e. the number of features is not fixed across different metrics). Finally, we identified the optimal number of features (i.e. the features that showed the lowest corrected p-values and which led to the highest balanced accuracy) for each of the 3 different Machine Learning classification algorithms considered (namely XGBoost, SVM, LDA)(Fig. 3). The exhaustive search algorithm yielded the feature sets (which nodes/ edges) with the best-balanced accuracies for each algorithm across different FC metrics. For the sake of simplicity, we discuss here the two best-performing FC metrics per classification algorithm (Fig. 4). In the case of the SVM algorithm, the AEC showed a balanced accuracy of 67.8% with a total of 31 top features, the PLV presented a balanced accuracy of 66.5 % with 36 top features. With the XBoost classifier, the CC showed a balanced accuracy of 63.8% with 35 top features), and the PLV presented a balanced accuracy of 62.8%, with 15 top features. Finally, in the case of the LDA classifier, the PLV showed a balanced accuracy

426 of 67.1%, with 34 top features and the AEC presented a performance of 63.0% with 38 top  
 427 features.  
 428 Given the lower performance obtained with the nodal metrics, we shall proceed with the  
 429 analyses exclusively on the edges.

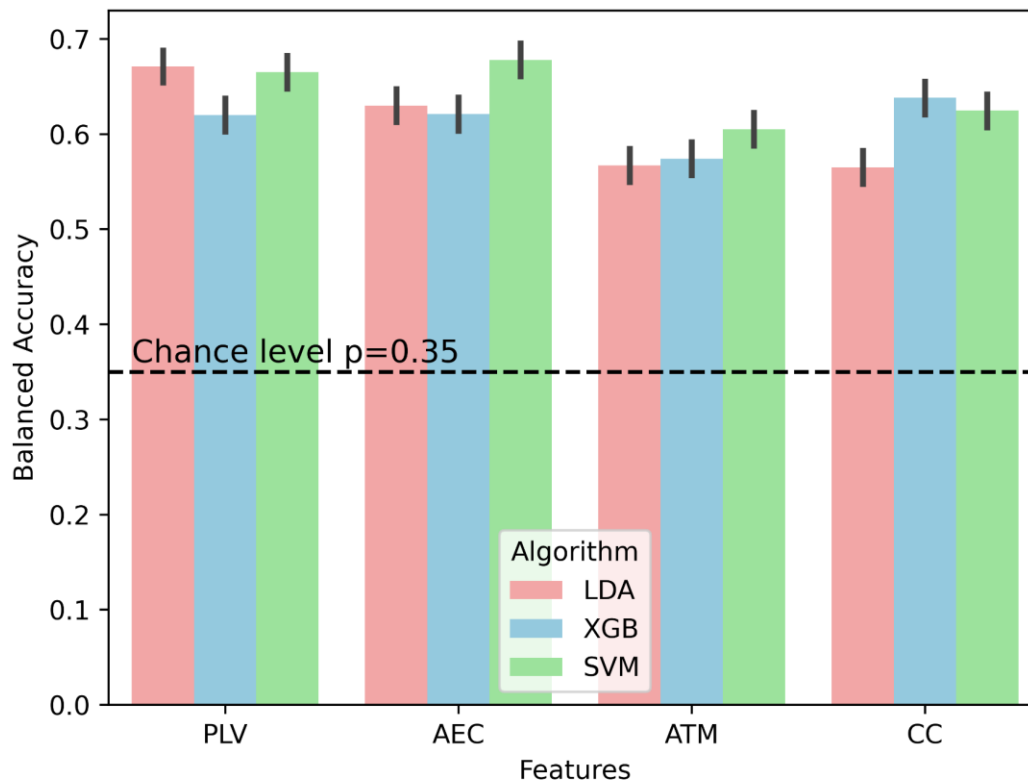

430 **Figure 4** Balanced accuracies for different metrics across 3 Machine Learning algorithms with its standard errors.  
 431 We observe consistent higher performance of PLV and AEC, in comparison to ATM and CC. The chance level for  
 432 our dataset equals 35%.

433  
 434  
 435 The chance level for the balanced problem with 4 classes is equal to 25%. However, since  
 436 we have a dataset with unbalanced classes, in such tasks the chance level is usually assumed  
 437 to be the probability of predicting the most frequent class label in the target. In our case, SLA,  
 438 which contains 38 patients out of 108, is the most numerous class. Therefore, the chance level  
 439 is calculated as follows:

$$440 \quad p = 38 / 108 \approx 0,35 \text{ or } 35\% \quad (1)$$

441  
 442  
 443 In this task, a more objective evaluation metric is the balanced accuracy. Nevertheless, it is  
 444 also useful to compare and evaluate overall accuracies. The trend remains the same – i.e. the  
 445 same edge-specific metrics stay as the top features sets. Still, the accuracies are slightly  
 446 higher: AEC (73.3%, 28 features), PLV (72.7%, 36 features), ATM (67.5%, 32 features), CC  
 447 (69.1%, 36 features) for SVM classifier; AEC (68.2%, 38 features), PLV (69.5%, 34 features),  
 448 ATM (63.2%, 15 features), CC (60.4%, 30 features) for LDA classifier; AEC (68.5%, 26  
 449 features), PLV (68.7%, 15 features), ATM (64.2%, 39 features), CC (70.5%, 35 features) for  
 450 XGBoost classifier.

451

452 Since the PLV is the most performant metric, we now focus on the PLV for sensitivity analyses.  
453

### 454 3.3 ROC curves

455

456 After repetitive stratified K-folds, we can estimate probabilities for each class to be correctly  
457 predicted (i.e. the probabilities sum up to 1) with different classification algorithms (LDA, SVM,  
458 XGB). We applied the One-vs-All technique, where we fix one desired class and all other  
459 classes are treated as one class. This way, we can replace our multi classification task to a  
460 binary class, and it enables us to build the ROC curves.

461 We calculated the average ROC curve for each repetition of the 10 folds, and the red curve  
462 displays the overall average ROC curve across 10 repetitions. The ROC curves were built for  
463 each class separately (Fig 5) which display the trade-off between False Positive Rate on x  
464 axis, and True Positive Rate on y axis.

465 ALS patients display the best results in terms of classification accuracy, and PD patients the  
466 worst results. Accordingly, it is worth mentioning that deviations of the ROC curves for PD  
467 patients are also much higher in comparison to other classes.

468

469

470

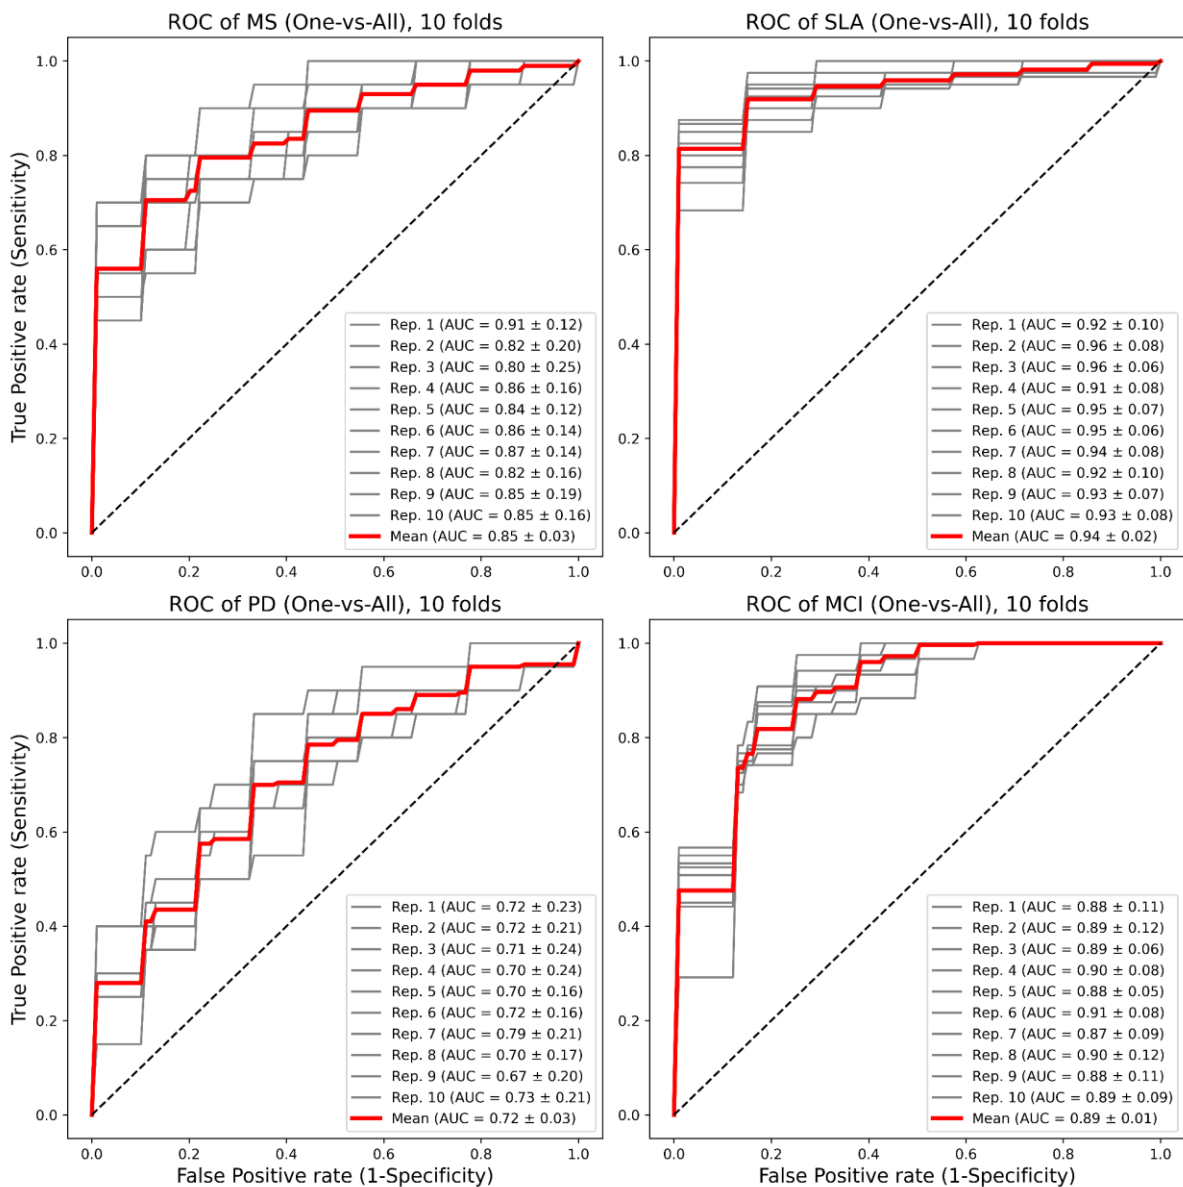

471

472

473

474

475

**Figure 5** ROC curves for 4 classes (MS, SLA, PD, MCI) for LDA machine learning classifier with overall mean curve and mean curves for each repetition of Stratified K-folds. ROC curves are built with PLV edge-based features with 10 repetitions over 10 k-folds.

476

### 3.4 Confusion Matrix

477

478

479

480

The confusion matrix was built to depict the whole picture of the classifier's performance: it allows seeing what percentage of each class was classified correctly, and where mistakes were made (Fig 6).



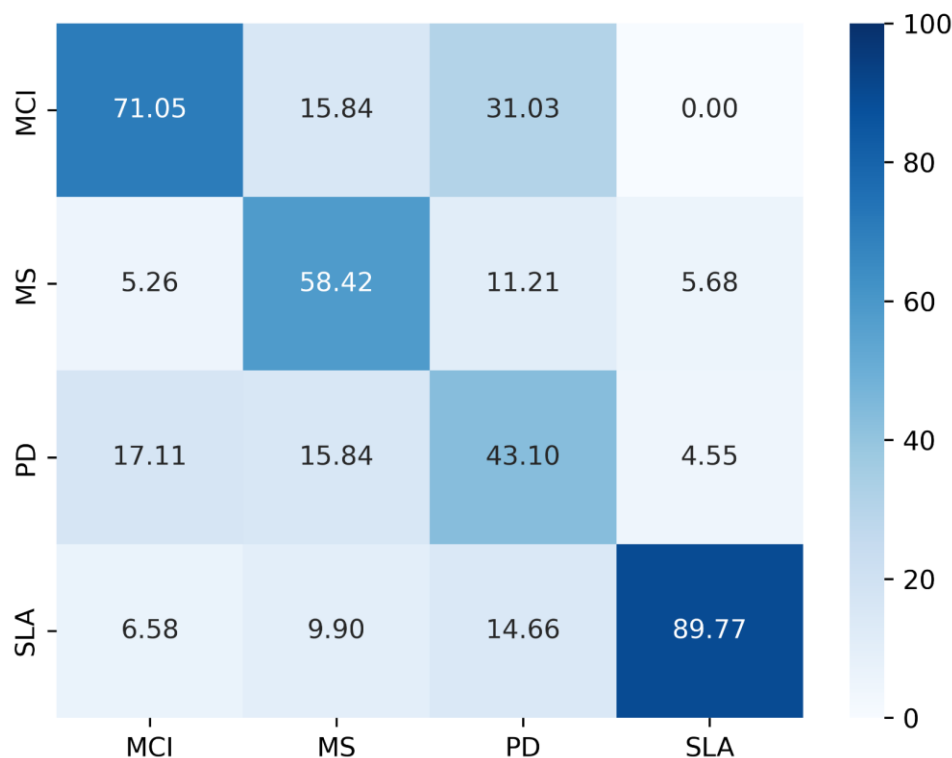

481  
482 **Figure 6** Confusion Matrix with relative percentage representation for 4 classes (SLA, PD, MS, MCI) with true  
483 values on y axis and predicted values on x axis for PLV features with LDA machine learning classifier.  
484

485 Again, one can observe that the accuracy for PD patients is the worst, while the results for  
486 ALS subjects are the best. While these results might be affected by imbalanced classes, the  
487 results for all classes are well above chance level (which is equal to 35%).  
488

### 489 3.5 Feature importance

490  
491 The XGBoost classification algorithm allows us to quantify and compare the relative  
492 importance of the features during the classification process. To get valid results, we have  
493 defined 10 cross-validations with stratified KFold. That is, the balance of the classes in the  
494 train and test splits are preserved. We run 40 times these stratified cross-validation iterations  
495 to reach convergence and then validate our results. After these steps, we obtained the feature  
496 importance for each of the features obtained from each FC metric taken separately (we focus  
497 here on the PLV, AEC, and ATM). Then, we evaluated and compared the features that  
498 showed the highest importance values for each of the sets considered (Fig. 7A)  
499

500  
501

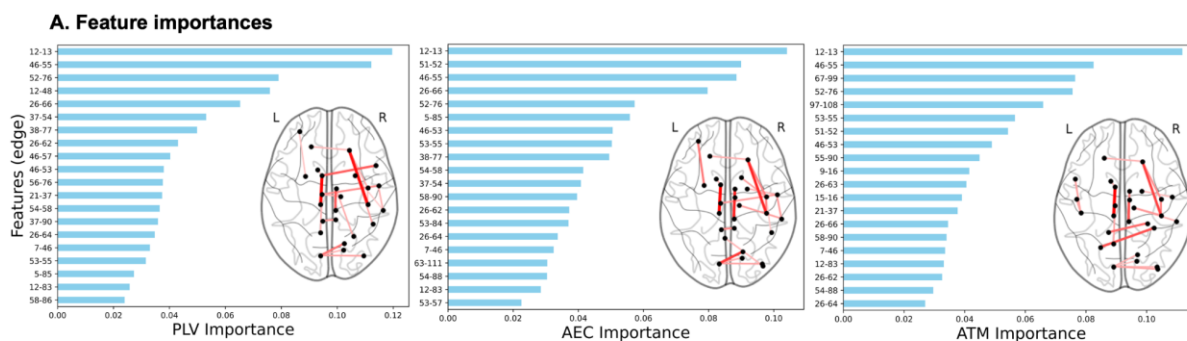

502

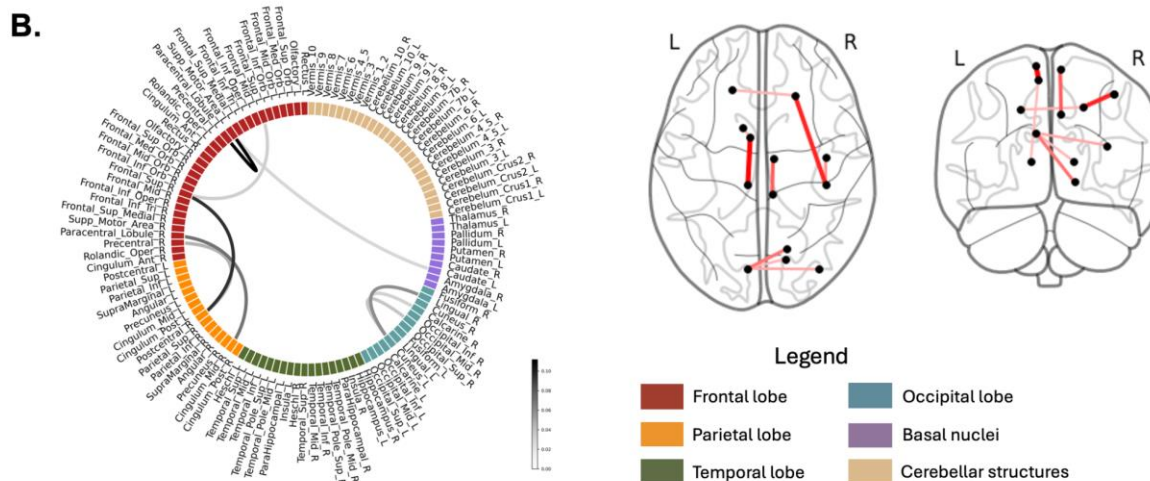

503

504

505 **Figure 7.** A. Feature importance for XGBoost across FC metrics along with these features on the brain plots.

506 B. Connectome of overlapping features and its brain plot. The list of the edges is reported in the supplementary

507 materials (see S6-S7-S8).

508

509 There are 9 overlapping features (i.e. edges) across 3 FC metrics (PLV, ATM, AEC), where

510 we focused on the first 20 features with the largest feature importance according to XGBoost

511 evaluation.

512 As an example of the consistency of our results across different metrics, the edge between

513 the left supplementary motor area and the left paracentral lobule is the most important in all 3

514 feature sets. At the same time, the edge between the right frontal superior gyrus and right post

515 central gyrus is also among the top 3 features across three feature sets.

516 Another interesting observation is that the left cuneus appears three times among the top pairs

517 of edges (pairs of edges left cuneus and right lingual, left cuneus and Occipital middle gyrus,

518 the left cuneus and the right calcarine cortex), meanwhile the left supplementary motor area,

519 the right frontal superior gyrus and the right postcentral gyrus appear twice (for the exhaustive

520 list of the region of interest see the supplementary material S3).

521

522

523 We selected 20 of the most significant features, according to their corrected pFDR values, and

524 ranked them across feature sets (where rank 1 means the most significant, and rank 20

525 indicates the least significant feature). This way, we identified that edge features for the next

526 pairs of ROIs: left supplementary motor area and left paracentral lobule, right frontal superior

527 gyrus and right postcentral gyrus, right paracentral lobule and right middle cingulum are

528 ranked as the top features (ranks 1 and 2) for three edge-specific FC metrics (AEC, PLV,

529 ATM), therefore we see a strong overlap of features across metrics.

530 We noticed that 9 edges out of 20 selected were the same for 3 different metrics – AEC, PLV  
531 and ATM (Fig 7B)  
532 To systematically test these findings, we applied pairwise Spearman correlation for the ranks  
533 of three metrics (Fig 8). This revealed that, indeed, PLV and AEC features' ranks are highly  
534 positively correlated with a correlation coefficient equal to 0.89.  
535 We observed that AEC, PLV and ATM have 9 overlapping features out of the 20 best features  
536 according to the p-values, including the Cross Correlations leaves only one overlapping  
537 feature.  
538  
539

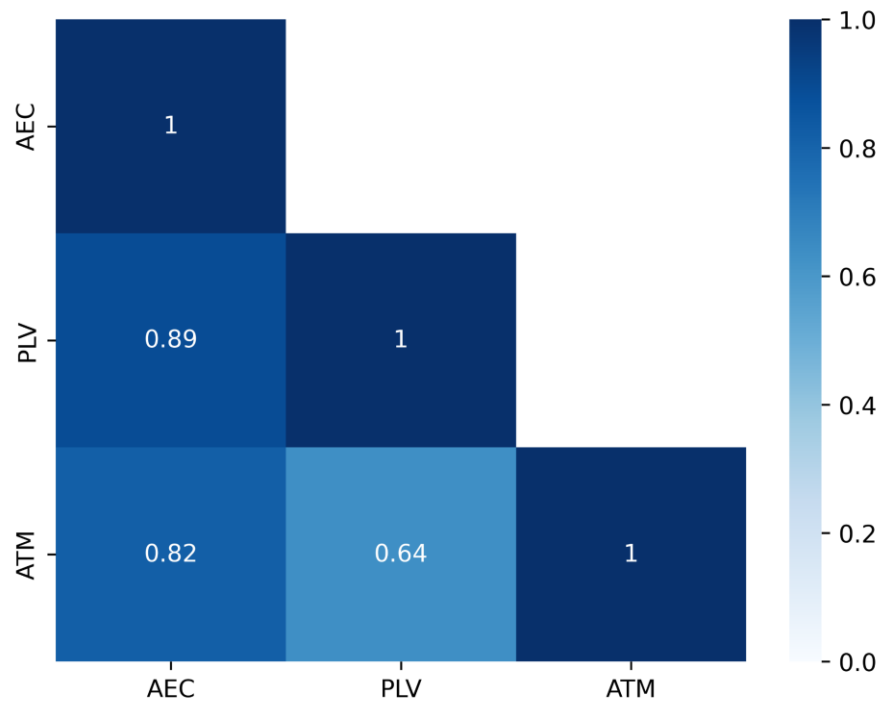

540  
541 **Figure 8.** Feature importance for XGBoost across metrics  
542  
543  
544  
545  
546  
547  
548

### 549 3. Discussion

550

551 In this study, we set out to identify a set of functional biomarkers to perform automated  
552 differential diagnosis (among MS, MCI, PD, and ALS) from MEG data. Our work focuses on  
553 the interpretability of the biomarkers, which is why we compared multiple connectivity metrics  
554 (AEC, PLV, Pearson's correlation coefficient, and ATM) that are different in terms of  
555 interpretation. We tested the robustness of our analyses by feeding the data features to  
556 multiple classification algorithms (i.e., XGBoost, SVM, LDA). In particular, we used a vast  
557 amount of MEG data from a total number of 109 subjects affected by four different neurological  
558 diseases: ALS, PD, MCI, and MS. Firstly, from each cohort, we extracted different feature sets  
559 from four different FC metrics (PLV, ATM, AEC, and CC), each of which was obtained starting  
560 from a symmetric matrix, leading to a total number of 6670 edge-wise features. Due to the  
561 high dimensionality of our sample, we performed a Kruskal-Wallis test to reduce the  
562 dimensionality and to consider only the most discriminative features.

563

564 Firstly, our results showed more than 120 significant edge features among the four different  
565 feature sets (PLV, AEC, ATM, CC) for all the diseases. In particular, the Kruskal-Wallis test  
566 showed statistical significance ( $pFDR < 0.0001$ ) of edge-wise PLV values between the right  
567 frontal superior gyrus and the right postcentral gyrus. This finding might be related to the fact  
568 that the frontal lobe is involved in physiological processes related to motor function (which are  
569 notably impaired in SLA, PD, and MS) as well as to cognitive function, such as long-term  
570 memory (which is often impaired in MCI).

571

572 We then move on to estimate the accuracy of the selected features by adding the features in  
573 an iterative manner according to their p values. Such an approach enabled us to determine  
574 the optimal number of top features for each FC metric taken separately. The AEC reached a  
575 balanced accuracy of 63.07% with 38 features added, while the edge-wise PLV displayed the  
576 best-balanced accuracy (67,14%) with a total number of 34 added features. To our knowledge,  
577 no previous research has combined MEG data from patients with MCI, MS, PD, and ALS.  
578 However, some research has focused on these conditions individually. As an example, López  
579 ME et al. (López et al., 2014a) examined 105 subjects (36 controls and 69 MCI cases). They  
580 identified spectral bio-marked changes in the theta, alpha, and beta frequency bands in MEG  
581 data in MCI. Kim MJ et al. (M.-J. Kim et al., 2023) utilized a large EEG dataset including 417  
582 MCI cases and applied a neural network that detected dementia with 81.1% accuracy. In the  
583 closely related work, Giovannetti A. et al. (Giovannetti et al., 2021) presented the Deep-MEG  
584 neural network, which was tested on 54 Alzheimer's patients, each undergoing a five-minute  
585 resting state task. Similarly to our study, they used functional connectivity indices, phase  
586 locking values for classification. They reported an 87.4% AUC-ROC in identifying early MCI  
587 symptoms. For multiple sclerosis disease, using EEG, Kiiski H. et al. (Kiiski et al., 2018)  
588 assessed the responses of 35 subjects with multiple sclerosis during event-related potential  
589 cognitive tasks over three years. They found significant correlations between ERP visual  
590 components and cognitive function, identified using machine learning techniques. In related  
591 research, Karaca et al. employed a continuous wavelet transform to differentiate nine multiple  
592 sclerosis patients from 11 controls, achieving accuracy rates between 80%-88% in their best-  
593 performing models (Karaca et al., 2021). Furthermore, Ahmadi A. et al. analyzed five MS  
594 patients, developing a detection model using phase locking values and an online sequential

595 extreme learning classifier, with performance scores ranging from 82% to 96% across different  
596 tasks (Ahmadi et al., 2019).

597

598 Our results are consistent across the three different ML algorithms (see Fig 3) with PLV and  
599 AEC showing the best accuracy with respect to ATM and CC. These results are in agreement  
600 with Chaturvedi et al., who showed that features extracted from the Phase lagIndex (PLI) were  
601 able to better discriminate between PD patients with and without MCI as compared to spectral  
602 features (Chaturvedi et al., 2019). These results might suggest that phase-based metrics  
603 might be more suitable in classification performance analysis as compared to amplitude-based  
604 metrics (i.e., power spectra). Phase-based metrics specifically capture synchronization among  
605 brain signals (defined as a bounded average phase difference). Synchronization is typically  
606 measured in the framework of the communication-through-coherence hypothesis (Fries,  
607 2015), whereby communication among brain regions might be captured by the coherent  
608 activities of the corresponding brain signals. On the other hand, non-periodic activities, as well  
609 as simple correlation coefficients, seem to perform less well in this context. Regardless of the  
610 chosen FC metric, we see a consistent trend where the estimates at the edge level outperform  
611 those at the nodal level in terms of disease classification. On the one hand, nodal metrics  
612 capture the local activities and are predominantly sensitive to the dynamics of the local  
613 activations. On the other hand, edge metrics focus primarily on how brain regions interact  
614 among themselves. Therefore, our results might be interpreted as evidence that  
615 neurodegenerative diseases primarily alter how regions interact with each other at the large-  
616 scale level. In particular, since the PLV is the best-performing metric, this might be interpreted  
617 as the neurodegenerative diseases altering the ability of brain regions that are far apart to  
618 synchronize their activities.

619 While the PLV is sensitive to volume conduction, volume conduction does not offer a  
620 reasonable explanation for the ability to classify different subjects according to diagnosis.  
621 Furthermore, the edges of the ATM (that are more robust to volume conduction artifacts) also  
622 confirm the ability to correctly diagnose patients well above chance level.

623 Furthermore, the set of edges that contributed more to the classification were FC metric-  
624 independent. In general, it is interesting to note that the edges that are relevant to classification  
625 irrespective of the metrics are typically longer range connections, either in the antero-posterior  
626 direction of cross-hemispheric. Again, these results are representative of significant  
627 involvement and, as a consequence, impairment, of the frontal lobe in PD, ALS, MS and MCI  
628 respectively (Foong et al., 1997; Kendi et al., 2008; Trojsi et al., 2012; Wang et al., 2012).

629

630 Not many studies explain the rationale behind the feature extraction and selection method  
631 choice. It usually consists in a trade-off between enriching the information of interest and the  
632 risk of adding irrelevant inputs that could reduce the classification performance. Two types of  
633 approaches have been proposed. The first one consists in considering that fusing features will  
634 result in an improvement of the classification performance. For instance, Geraedts et al fused  
635 features obtained from the estimation of the power spectra in seven frequency bands (resulting  
636 in 16 674 features per EEG) before selecting them to discriminate cognitive functions in  
637 patients with Parkinson's Disease during Deep Brain Stimulation (Geraedts et al., 2021).  
638 Similarly, López et al extracted spectral and non-linear metrics before fusing them and  
639 selecting them via their fast correlation-based filter to discriminate early Alzheimer's disease  
640 and its prodromal form from healthy subjects (López et al., 2014b).

641 Another approach consists in fusing the classifiers' output rather than the different types of  
642 features. Fusing the classifiers' outputs confers a higher reliability and robustness through  
643 redundancy and facilitates the integration of heterogeneous data without  
644 normalizing them (Roli, 2009; Roli & Fumera, 2002; Ruta & Gabrys, 2000). In a recent work,  
645 we proposed a framework that was based on Riemannian geometry extended to functional  
646 connectivity measures through an ensemble learning method. We validated it on numerous  
647 publicly available datasets (Corsi et al., 2022). Such an approach notably ranked 1st in a  
648 clinical challenge that consisted in discriminating mental states from data obtained from stroke  
649 patients (Corsi et al., 2021). Future work will consist in considering this type of approach to  
650 enrich the information of interest used to discriminate diseases.

651 In conclusion, our is the first study investigating automated differential diagnosis in several  
652 neurological diseases, based on different connectivity metrics as well as on different  
653 classification algorithms. Our results demonstrate the existence of a common set of edges  
654 that drive the classification performance, irrespective of the particular metric chosen or the  
655 algorithm. These results demonstrate the existence of a robust set of long-range connections  
656 that are altered in neurodegeneration, across multiple diseases, and valid in terms of  
657 distinguishing specific diseases. Future studies will have to confirm the external validity of our  
658 results to different datasets and extend our analyses to more neurodegenerative diseases.

#### 659 **Data availability statement**

660 The magnetoencephalography data and the reconstructed avalanches are available upon  
661 request to the corresponding author, conditional on appropriate ethics approval at the local  
662 site. The availability of the data was not previously included in the ethical approval, and  
663 therefore data cannot be shared directly. In case data are requested, the corresponding author  
664 will request an amendment to the local ethical committee.

#### 665 **Competing interests**

666 The authors report no competing interests

#### 667 **Funding**

668  
669 This work was financially supported by Ministero Sviluppo Economico (Contratto di sviluppo  
670 industriale "Farmaceutica e Diagnostica" [CDS 000606]); European Union  
671 "NextGenerationEU," (Investimento 3.1. M4. C2), project IR0000011, EBRAINS-Italy of PNRR  
672 and Contratto di sviluppo industriale- "Progetto CDS000904 - agevolazioni ex DM del  
673 09/12/2014"

674

675

676 **References**

677

678 Ahmadi, A., Davoudi, S., & Daliri, M. R. (2019). Computer Aided Diagnosis System for  
679 multiple sclerosis disease based on phase to amplitude coupling in covert visual  
680 attention. *Computer Methods and Programs in Biomedicine*, 169, 9–18.  
681 <https://doi.org/10.1016/j.cmpb.2018.11.006>

682 Albert, M. S., DeKosky, S. T., Dickson, D., Dubois, B., Feldman, H. H., Fox, N. C., Gamst,  
683 A., Holtzman, D. M., Jagust, W. J., Petersen, R. C., Snyder, P. J., Carrillo, M. C.,  
684 Thies, B., & Phelps, C. H. (2011). The diagnosis of mild cognitive impairment due to  
685 Alzheimer's disease: Recommendations from the National Institute on Aging-  
686 Alzheimer's Association workgroups on diagnostic guidelines for Alzheimer's  
687 disease. *Alzheimer's & Dementia: The Journal of the Alzheimer's Association*, 7(3),  
688 270–279. <https://doi.org/10.1016/j.jalz.2011.03.008>

689 Bastos, A. M., & Schoffelen, J.-M. (2016). A Tutorial Review of Functional Connectivity  
690 Analysis Methods and Their Interpretational Pitfalls. *Frontiers in Systems*  
691 *Neuroscience*, 9. <https://doi.org/10.3389/fnsys.2015.00175>

692 Brookes, M. J., Woolrich, M., Luckhoo, H., Price, D., Hale, J. R., Stephenson, M. C., Barnes,  
693 G. R., Smith, S. M., & Morris, P. G. (2011). Investigating the electrophysiological  
694 basis of resting state networks using magnetoencephalography. *Proceedings of the*  
695 *National Academy of Sciences of the United States of America*, 108(40), 16783–  
696 16788. <https://doi.org/10.1073/pnas.1112685108>

697 Brookes, M. J., Woolrich, M. W., & Barnes, G. R. (2012). *Measuring functional connectivity*  
698 *in MEG: A multivariate approach insensitive to linear source leakage*.  
699 <https://doi.org/10.1016/j.neuroimage.2012.03.048>

700 Brooks, B. R. (1994). El Escorial World Federation of Neurology criteria for the diagnosis of  
701 amyotrophic lateral sclerosis. Subcommittee on Motor Neuron Diseases/Amyotrophic  
702 Lateral Sclerosis of the World Federation of Neurology Research Group on  
703 Neuromuscular Diseases and th. *Journal of the Neurological Sciences*, 124, 96–107.

- 704 Chaturvedi, M., Bogaarts, J. G., Kozak (Cozac), V. V., Hatz, F., Gschwandtner, U., Meyer,  
705 A., Fuhr, P., & Roth, V. (2019). Phase lag index and spectral power as QEEG  
706 features for identification of patients with mild cognitive impairment in Parkinson's  
707 disease. *Clinical Neurophysiology*, 130(10), 1937–1944.  
708 <https://doi.org/10.1016/j.clinph.2019.07.017>
- 709 Cipriano, L., Minino, R., Liparoti, M., Polverino, A., Romano, A., Bonavita, S., Pirozzi, M. A.,  
710 Quarantelli, M., Jirsa, V., Sorrentino, G., Sorrentino, P., & Troisi Lopez, E. (2024).  
711 Flexibility of brain dynamics is increased and predicts clinical impairment in  
712 relapsing–remitting but not in secondary progressive multiple sclerosis. *Brain*  
713 *Communications*, 6(2), fcae112. <https://doi.org/10.1093/braincomms/fcae112>
- 714 Corsi, M.-C., Chavez, M., Schwartz, D., George, N., Hugueville, L., Kahn, A. E., Dupont, S.,  
715 Bassett, D. S., & De Vico Fallani, F. (2020). Functional disconnection of associative  
716 cortical areas predicts performance during BCI training. *NeuroImage*, 209, 116500.  
717 <https://doi.org/10.1016/j.neuroimage.2019.116500>
- 718 Corsi, M.-C., Chevallier, S., de Vico Fallani, F., & Yger, F. (2022). Functional connectivity  
719 ensemble method to enhance BCI performance (FUCONE). *IEEE Transactions on*  
720 *Biomedical Engineering*, 1–1. <https://doi.org/10.1109/TBME.2022.3154885>
- 721 Corsi, M.-C., Yger, F., Chevallier, S., & Noûs, C. (2021). Riemannian Geometry on  
722 Connectivity for Clinical BCI. *ICASSP 2021 - 2021 IEEE International Conference on*  
723 *Acoustics, Speech and Signal Processing (ICASSP)*, 980–984.  
724 <https://doi.org/10.1109/ICASSP39728.2021.9414790>
- 725 Finn, E. S., & Rosenberg, M. D. (2021). Beyond fingerprinting: Choosing predictive  
726 connectomes over reliable connectomes. *NeuroImage*, 239, 118254.  
727 <https://doi.org/10.1016/j.neuroimage.2021.118254>
- 728 Foong, J., Rozewicz, L., Quaghebeur, G., Davie, C. A., Kartsounis, L. D., Thompson, A. J.,  
729 Miller, D. H., & Ron, M. A. (1997). Executive function in multiple sclerosis. The role of  
730 frontal lobe pathology. *Brain*, 120(1), 15–26. <https://doi.org/10.1093/brain/120.1.15>
- 731 Fries, P. (2015). Rhythms For Cognition: Communication Through Coherence HHS Public



- 732 Access. *Neuron*, 88(1), 220–235. <https://doi.org/10.1016/j.neuron.2015.09.034>
- 733 Friston, K. J. (1994). Functional and effective connectivity in neuroimaging: A synthesis.
- 734 *Human Brain Mapping*, 2(1–2), 56–78. <https://doi.org/10.1002/hbm.460020107>
- 735 Geraedts, V. J., Koch, M., Contarino, M. F., Middelkoop, H. A. M., Wang, H., van Hilten, J.
- 736 J., Bäck, T. H. W., & Tannemaat, M. R. (2021). Machine learning for automated
- 737 EEG-based biomarkers of cognitive impairment during Deep Brain Stimulation
- 738 screening in patients with Parkinson’s Disease. *Clinical Neurophysiology*, 132(5),
- 739 1041–1048. <https://doi.org/10.1016/j.clinph.2021.01.021>
- 740 Gibb, W. R. G., & Lees, A. J. (1988). A comparison of clinical and pathological features of
- 741 young- and old-onset Parkinson’s disease. *Neurology*, 38(9), 1402–1402.
- 742 <https://doi.org/10.1212/WNL.38.9.1402>
- 743 Giovannetti, A., Susi, G., Casti, P., Mencattini, A., Pusil, S., López, M. E., Di Natale, C., &
- 744 Martinelli, E. (2021). Deep-MEG: Spatiotemporal CNN features and multiband
- 745 ensemble classification for predicting the early signs of Alzheimer’s disease with
- 746 magnetoencephalography. *Neural Computing and Applications*, 33(21), 14651–
- 747 14667. <https://doi.org/10.1007/s00521-021-06105-4>
- 748 Grinsztajn, L., Oyallon, E., & Varoquaux, G. (2022). *Why do tree-based models still*
- 749 *outperform deep learning on tabular data?* (arXiv:2207.08815). arXiv.
- 750 <https://doi.org/10.48550/arXiv.2207.08815>
- 751 Haldeman, C., & Beggs, J. M. (2005). Critical Branching Captures Activity in Living Neural
- 752 Networks and Maximizes the Number of Metastable States. *Physical Review Letters*,
- 753 94(5), 058101. <https://doi.org/10.1103/PhysRevLett.94.058101>
- 754 Karaca, B. K., Akşahin, M. F., & Öcal, R. (2021). Detection of multiple sclerosis from photic
- 755 stimulation EEG signals. *Biomedical Signal Processing and Control*, 67, 102571.
- 756 <https://doi.org/10.1016/j.bspc.2021.102571>
- 757 Kelly, R. E., & Hoptman, M. J. (2022). Replicability in Brain Imaging. *Brain Sciences*, 12(3),
- 758 397. <https://doi.org/10.3390/brainsci12030397>
- 759 Kendi, A. T. K., Lehericy, S., Luciana, M., Ugurbil, K., & Tuite, P. (2008). Altered Diffusion in

- 760 the Frontal Lobe in Parkinson Disease. *American Journal of Neuroradiology*, 29(3),  
761 501–505. <https://doi.org/10.3174/ajnr.A0850>
- 762 Kiiski, H., Jollans, L., Donnchadha, S. Ó., Nolan, H., Lonergan, R., Kelly, S., O'Brien, M. C.,  
763 Kinsella, K., Bramham, J., Burke, T., Hutchinson, M., Tubridy, N., Reilly, R. B., &  
764 Whelan, R. (2018). Machine Learning EEG to Predict Cognitive Functioning and  
765 Processing Speed Over a 2-Year Period in Multiple Sclerosis Patients and Controls.  
766 *Brain Topography*, 31(3), 346–363. <https://doi.org/10.1007/s10548-018-0620-4>
- 767 Kim, J.-H. (2009). Estimating classification error rate: Repeated cross-validation, repeated  
768 hold-out and bootstrap. *Computational Statistics & Data Analysis*, 53(11), 3735–  
769 3745. <https://doi.org/10.1016/j.csda.2009.04.009>
- 770 Kim, M.-J., Youn, Y. C., & Paik, J. (2023). Deep learning-based EEG analysis to classify  
771 normal, mild cognitive impairment, and dementia: Algorithms and dataset.  
772 *NeuroImage*, 272, 120054. <https://doi.org/10.1016/j.neuroimage.2023.120054>
- 773 Lachaux, J. P., Rodriguez, E., Martinerie, J., & Varela, F. J. (1999). Measuring phase  
774 synchrony in brain signals. *Human Brain Mapping*, 8(4), 194–208.  
775 [https://doi.org/10.1002/\(sici\)1097-0193\(1999\)8:4<194::aid-hbm4>3.0.co;2-c](https://doi.org/10.1002/(sici)1097-0193(1999)8:4<194::aid-hbm4>3.0.co;2-c)
- 776 Lin, W., Gao, Q., Du, M., Chen, W., & Tong, T. (2021). Multiclass diagnosis of stages of  
777 Alzheimer's disease using linear discriminant analysis scoring for multimodal data.  
778 *Computers in Biology and Medicine*, 134, 104478.  
779 <https://doi.org/10.1016/j.compbiomed.2021.104478>
- 780 López, M. E., Cuesta, P., Garcés, P., Castellanos, P. N., Aurtenetxe, S., Bajo, R., Marcos,  
781 A., Delgado, M. L., Montejo, P., López-Pantoja, J. L., Maestú, F., & Fernandez, A.  
782 (2014a). MEG spectral analysis in subtypes of mild cognitive impairment. *Age*  
783 (*Dordrecht, Netherlands*), 36(3), 9624. <https://doi.org/10.1007/s11357-014-9624-5>
- 784 López, M. E., Cuesta, P., Garcés, P., Castellanos, P. N., Aurtenetxe, S., Bajo, R., Marcos,  
785 A., Delgado, M. L., Montejo, P., López-Pantoja, J. L., Maestú, F., & Fernandez, A.  
786 (2014b). MEG spectral analysis in subtypes of mild cognitive impairment. *Age*  
787 (*Dordrecht, Netherlands*), 36(3), 9624. <https://doi.org/10.1007/s11357-014-9624-5>

- 788 Manju, N., Harish, B. S., & Prajwal, V. (n.d.). Ensemble Feature Selection and Classification  
789 of Internet Traffic using XGBoost Classifier. *International Journal of Computer*  
790 *Network and Information Security*, 11(7), 37.
- 791 Maqsood, S., Damaševičius, R., & Maskeliūnas, R. (2022). Multi-Modal Brain Tumor  
792 Detection Using Deep Neural Network and Multiclass SVM. *Medicina (Kaunas,*  
793 *Lithuania)*, 58(8), 1090. <https://doi.org/10.3390/medicina58081090>
- 794 Nolte, G. (2003). The magnetic lead field theorem in the quasi-static approximation and its  
795 use for magnetoencephalography forward calculation in realistic volume conductors.  
796 *Physics in Medicine and Biology*, 48(22), 3637–3652. [https://doi.org/10.1088/0031-](https://doi.org/10.1088/0031-9155/48/22/002)  
797 [9155/48/22/002](https://doi.org/10.1088/0031-9155/48/22/002)
- 798 Polverino, A., Lopez, E. T., Minino, R., Liparoti, M., Romano, A., Trojsi, F., Lucidi, F., Gollo,  
799 L., Jirsa, V., Sorrentino, G., & Sorrentino, P. (2022). Flexibility of Fast Brain  
800 Dynamics and Disease Severity in Amyotrophic Lateral Sclerosis. *Neurology*.  
801 <https://doi.org/10.1212/WNL.0000000000201200>
- 802 Polverino, A., Troisi Lopez, E., Liparoti, M., Minino, R., Romano, A., Cipriano, L., Trojsi, F.,  
803 Jirsa, V., Sorrentino, G., & Sorrentino, P. (2024). Altered spreading of fast aperiodic  
804 brain waves relates to disease duration in Amyotrophic Lateral Sclerosis. *Clinical*  
805 *Neurophysiology*, 163, 14–21. <https://doi.org/10.1016/j.clinph.2024.04.003>
- 806 Roli, F. (2009). Multiple Classifier Systems. In S. Z. Li & A. Jain (Eds.), *Encyclopedia of*  
807 *Biometrics* (pp. 981–986). Springer US.  
808 [http://link.springer.com/referenceworkentry/10.1007/978-0-387-73003-5\\_148](http://link.springer.com/referenceworkentry/10.1007/978-0-387-73003-5_148)
- 809 Roli, F., & Fumera, G. (2002). Analysis of Linear and Order Statistics Combiners for Fusion  
810 of Imbalanced Classifiers. *Multiple Classifier Systems*, 252–261.  
811 [https://doi.org/10.1007/3-540-45428-4\\_25](https://doi.org/10.1007/3-540-45428-4_25)
- 812 Romano, A., Troisi Lopez, E., Cipriano, L., Liparoti, M., Minino, R., Polverino, A., Cavaliere,  
813 C., Aiello, M., Granata, C., Sorrentino, G., & Sorrentino, P. (2023). Topological  
814 changes of fast large-scale brain dynamics in mild cognitive impairment predict early  
815 memory impairment: A resting-state, source reconstructed,

- 816 magnetoencephalography study. *Neurobiology of Aging*, 132, 36–46.
- 817 <https://doi.org/10.1016/j.neurobiolaging.2023.08.003>
- 818 Romano, A., Troisi Lopez, E., Liparoti, M., Polverino, A., Minino, R., Trojsi, F., Bonavita, S.,  
819 Mandolesi, L., Granata, C., Amico, E., Sorrentino, G., & Sorrentino, P. (2022). The  
820 progressive loss of brain network fingerprints in Amyotrophic Lateral Sclerosis  
821 predicts clinical impairment. *NeuroImage: Clinical*, 35, 103095.  
822 <https://doi.org/10.1016/j.nicl.2022.103095>
- 823 Ruta, D., & Gabrys, B. (2000). An Overview of Classifier Fusion Methods. *Computing and*  
824 *Information Systems*, 7(1), 1–10.
- 825 Shine, J. M., Bissett, P. G., Bell, P. T., Koyejo, O., Balsters, J. H., Gorgolewski, K. J.,  
826 Moodie, C. A., & Poldrack, R. A. (2016). The Dynamics of Functional Brain Networks:  
827 Integrated Network States during Cognitive Task Performance. *Neuron*, 92(2), 544–  
828 554. <https://doi.org/10.1016/j.neuron.2016.09.018>
- 829 Shriki, O., Alstott, J., Carver, F., Holroyd, T., Henson, R. N. A., Smith, M. L., Coppola, R.,  
830 Bullmore, E., & Plenz, D. (2013). Neuronal avalanches in the resting MEG of the  
831 human brain. *Journal of Neuroscience*, 33(16), 7079–7090.  
832 <https://doi.org/10.1523/JNEUROSCI.4286-12.2013>
- 833 Sorrentino, P., Petkoski, S., Sparaco, M., Troisi Lopez, E., Signoriello, E., Baseliace, F.,  
834 Bonavita, S., Pirozzi, M. A., Quarantelli, M., Sorrentino, G., & Jirsa, V. (2022). Whole-  
835 brain propagation delays in multiple sclerosis, a combined tractography—  
836 Magnetoencephalography study. *The Journal of Neuroscience*, JN-RM-0938-22.  
837 <https://doi.org/10.1523/JNEUROSCI.0938-22.2022>
- 838 Sorrentino, P., Rucco, R., Baseliace, F., Micco, R. D., Tessitore, A., Hillebrand, A., Mandolesi,  
839 L., Breakspear, M., Gollo, L. L., & Sorrentino, G. (2019). Extensive functional  
840 repertoire underpins complex behaviours: Insights from Parkinson's disease. In  
841 *bioRxiv* (p. 823849). Cold Spring Harbor Laboratory. <https://doi.org/10.1101/823849>
- 842 Sorrentino, P., Rucco, R., Jacini, F., Trojsi, F., Lardone, A., Baseliace, F., Femiano, C.,  
843 Santangelo, G., Granata, C., Vettoliere, A., Monsurrò, M. R., Tedeschi, G., &

844 Sorrentino, G. (2018). Brain functional networks become more connected as  
845 amyotrophic lateral sclerosis progresses: A source level magnetoencephalographic  
846 study. *NeuroImage: Clinical*, 20, 564–571. <https://doi.org/10.1016/j.nicl.2018.08.001>

847 Sorrentino, P., Rucco, R., Lardone, A., Liparoti, M., Lopez, E. T., Cavaliere, C., Soricelli, A.,  
848 Jirsa, V., Sorrentino, G., & Amico, E. (n.d.). *Clinical connectome fingerprints of*  
849 *cognitive decline*. <https://doi.org/10.1101/2020.10.09.332635>

850 Sorrentino, P., Seguin, C., Rucco, R., Liparoti, M., Troisi Lopez, E., Bonavita, S., Quarantelli,  
851 M., Sorrentino, G., Jirsa, V., & Zalesky, A. (2021). The structural connectome  
852 constrains fast brain dynamics. *eLife*, 10, e67400. <https://doi.org/10.7554/eLife.67400>

853 Stam, C. J. (2010). Use of magnetoencephalography (MEG) to study functional brain  
854 networks in neurodegenerative disorders. *Journal of the Neurological Sciences*,  
855 289(1–2), 128–134. <https://doi.org/10.1016/j.jns.2009.08.028>

856 Tagliazucchi, E., von Wegner, F., Morzelewski, A., Brodbeck, V., & Laufs, H. (2012).  
857 Dynamic BOLD functional connectivity in humans and its electrophysiological  
858 correlates. *Frontiers in Human Neuroscience*, 6(DEC).  
859 <https://doi.org/10.3389/fnhum.2012.00339>

860 Thölke, P., Mantilla-Ramos, Y.-J., Abdelhedi, H., Maschke, C., Dehgan, A., Harel, Y.,  
861 Kemtur, A., Mekki Berrada, L., Sahraoui, M., Young, T., Bellemare Pépin, A., El  
862 Khantour, C., Landry, M., Pascarella, A., Hadid, V., Combrisson, E., O’Byrne, J., &  
863 Jerbi, K. (2023). Class imbalance should not throw you off balance: Choosing the  
864 right classifiers and performance metrics for brain decoding with imbalanced data.  
865 *NeuroImage*, 277, 120253. <https://doi.org/10.1016/j.neuroimage.2023.120253>

866 Thompson, A. J., Banwell, B. L., Barkhof, F., Carroll, W. M., Coetzee, T., Comi, G., Correale,  
867 J., Fazekas, F., Filippi, M., Freedman, M. S., Fujihara, K., Galetta, S. L., Hartung, H.  
868 P., Kappos, L., Lublin, F. D., Marrie, R. A., Miller, A. E., Miller, D. H., Montalban, X.,  
869 ... Cohen, J. A. (2018). Diagnosis of multiple sclerosis: 2017 revisions of the  
870 McDonald criteria. *The Lancet Neurology*, 17(2), 162–173.  
871 [https://doi.org/10.1016/S1474-4422\(17\)30470-2](https://doi.org/10.1016/S1474-4422(17)30470-2)

872 Trojsi, F., Monsurro, M. R., Esposito, F., & Tedeschi, G. (2012). Widespread structural and  
873 functional connectivity changes in amyotrophic lateral sclerosis: Insights from  
874 advanced neuroimaging research. *Neural Plasticity*, 2012.

875 Wang, Z., Jia, X., Liang, P., Qi, Z., Yang, Y., Zhou, W., & Li, K. (2012). Changes in thalamus  
876 connectivity in mild cognitive impairment: Evidence from resting state fMRI.  
877 *European Journal of Radiology*, 81(2), 277–285.  
878 <https://doi.org/10.1016/j.ejrad.2010.12.044>

879  
880  
881  
882

883  
884  
885  
886  
887

888

889

## Supplementary materials

**Supplementary materials 1:** The balanced accuracies for all feature sets with SVM classifier. Each bar plot displays the averaged accuracy with its standard errors.

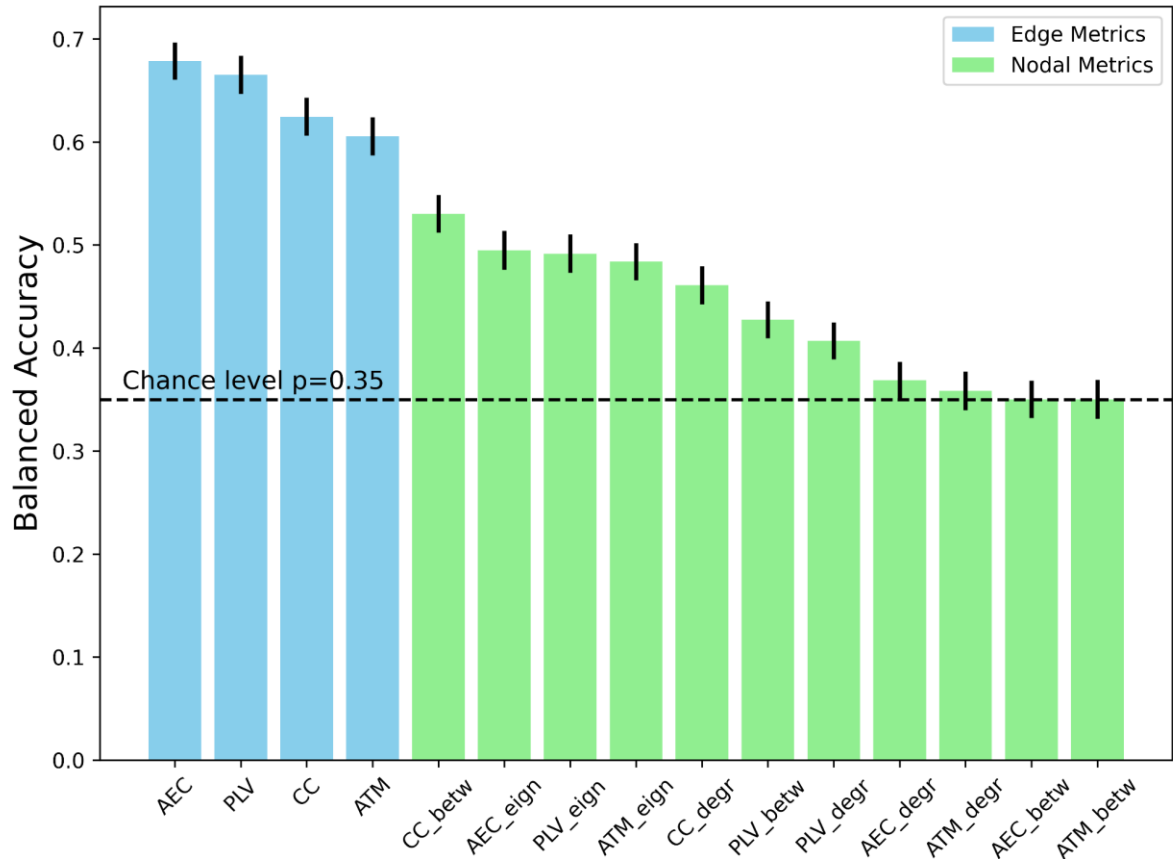

**Supplementary materials 2:** The balanced accuracies for all feature sets with XGBoost classifier. Each bar plot displays the averaged accuracy with its standard errors.

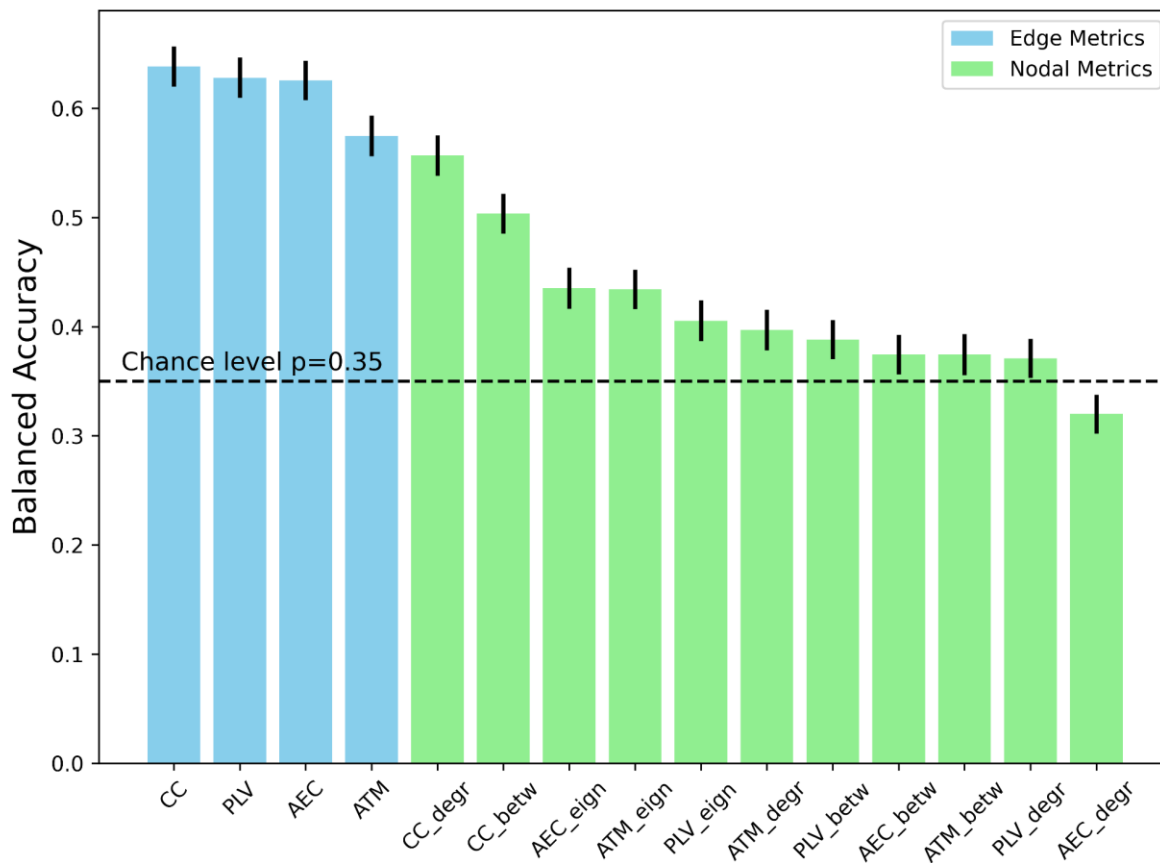

Supplementary materials 3: Exhaustive list of regions of interest

| N° ROIS | Anatomical correspondance     | N° ROIS | Anatomical correspondance     | N° ROIS | Anatomical correspondance |
|---------|-------------------------------|---------|-------------------------------|---------|---------------------------|
| 1       | Rectus L                      | 40      | Rectus R                      | 79      | Hippocampus L             |
| 2       | Olfactory L                   | 41      | Olfactory R                   | 80      | Hippocampus R             |
| 3       | Frontal Superior Orbital L    | 42      | Frontal Superior Orbital R    | 81      | Amygdala L                |
| 4       | Frontal Medial Orbital L      | 43      | Frontal Medial Orbital R      | 82      | Amygdala R                |
| 5       | Frontal Medial Orbital L      | 44      | Frontal Medial Orbital R      | 83      | Caudate L                 |
| 6       | Frontal Inferior Orbital L    | 45      | Frontal Inferior Orbital R    | 84      | Caudate R                 |
| 7       | Frontal Superior L            | 46      | Frontal Superior R            | 85      | Putamen L                 |
| 8       | Frontal Medial L              | 47      | Frontal Medial R              | 86      | Putamen R                 |
| 9       | Frontal Inferior Operculum L  | 48      | Frontal Inferior Operculum R  | 87      | Pallidum L                |
| 10      | Frontal Inferior Triangular L | 49      | Frontal Inferior Triangular R | 88      | Pallidum R                |
| 11      | Frontal Superior Medial L     | 50      | Frontal Superior Medial R     | 89      | Thalamus L                |
| 12      | Supplementary Motor area L    | 51      | Supplementary Motor area R    | 90      | Thalamus R                |
| 13      | Paracentral Lobule L          | 52      | Paracentral Lobule R          | 91      | Cerebellum Crus1 L        |
| 14      | Precentral L                  | 53      | Precentral R                  | 92      | Cerebellum Crus1 R        |
| 15      | Rolandic Operculum L          | 54      | Rolandic Operculum R          | 93      | Cerebellum Crus2 L        |
| 16      | Postcentral L                 | 55      | Postcentral R                 | 94      | Cerebellum Crus2 R        |



|    |                          |    |                          |     |                  |
|----|--------------------------|----|--------------------------|-----|------------------|
| 17 | Parietal Superior L      | 56 | Parietal Superior R      | 95  | Cerebellum 3 L   |
| 18 | Parietal Inferior L      | 57 | Parietal Inferior R      | 96  | Cerebellum 3 R   |
| 19 | Supra Marginal L         | 58 | Supra Marginal R         | 97  | Cerebellum 4 5 L |
| 20 | Angular L                | 59 | Angular R                | 98  | Cerebellum 4 5 R |
| 21 | Precuneus L              | 60 | Precuneus R              | 99  | Cerebellum 6 L   |
| 22 | Occipital Superior L     | 61 | Occipital Superior R     | 100 | Cerebellum 6 R   |
| 23 | Occipital Medial L       | 62 | Occipital Medial R       | 101 | Cerebellum 7b L  |
| 24 | Occipital Inferior L     | 63 | Occipital Inferior R     | 102 | Cerebellum 7b R  |
| 25 | Calcarine L              | 64 | Calcarine R              | 103 | Cerebellum 8 L   |
| 26 | Cuneus L                 | 65 | Cuneus R                 | 104 | Cerebellum 8 R   |
| 27 | Lingual gyrus L          | 66 | Lingual gyrus R          | 105 | Cerebellum 9 L   |
| 28 | Fusiform gyrus L         | 67 | Fusiform gyrus R         | 106 | Cerebellum 9 R   |
| 29 | Heschl L                 | 68 | Heschl R                 | 107 | Cerebellum 10 L  |
| 30 | Temporal Superior L      | 69 | Temporal Superior R      | 108 | Cerebellum 10 R  |
| 31 | Temporal Medial L        | 70 | Temporal Medial R        | 109 | Vermis 1 2       |
| 32 | Temporal Inferior L      | 71 | Temporal Inferior R      | 110 | Vermis 3         |
| 33 | Temporal Pole Superior L | 72 | Temporal Pole Superior R | 111 | Vermis 4 5       |
| 34 | Temporal Pole Medial L   | 73 | Temporal Pole Medial R   | 112 | Vermis 6         |
| 35 | ParaHippocampal L        | 74 | ParaHippocampal R        | 113 | Vermis 7         |
| 36 | Cingulum Anterior L      | 75 | Cingulum Anterior R      | 114 | Vermis 8         |
| 37 | Cingulum Medial L        | 76 | Cingulum Medial R        | 115 | Vermis 9         |
| 38 | Cingulum Posterior L     | 77 | Cingulum Posterior R     | 116 | Vermis 10        |
| 39 | Insula L                 | 78 | Insula R                 |     |                  |

Supplementary materials 4: Balanced accuracy for the number of features which contain the best accuracy across different metrics (PLV, AEC, ATM, CC) with XGBoost.

|                      | n=15  | n=17  | n=18  | n=19  | n=24  | n=25  | n=26  | n=27  | n=28  | n=35  | n=38  | n=39  |
|----------------------|-------|-------|-------|-------|-------|-------|-------|-------|-------|-------|-------|-------|
| <i>Edge metrics</i>  |       |       |       |       |       |       |       |       |       |       |       |       |
| <b>PLV</b>           | 0.628 | 0.606 | 0.597 | 0.618 | 0.575 | 0.577 | 0.573 | 0.563 | 0.572 | 0.544 | 0.559 | 0.557 |
| <b>AEC</b>           | 0.554 | 0.606 | 0.597 | 0.601 | 0.594 | 0.611 | 0.626 | 0.622 | 0.617 | 0.602 | 0.602 | 0.622 |
| <b>ATM</b>           | 0.513 | 0.533 | 0.533 | 0.551 | 0.55  | 0.535 | 0.524 | 0.519 | 0.531 | 0.561 | 0.554 | 0.575 |
| <b>CC</b>            | 0.529 | 0.565 | 0.559 | 0.574 | 0.591 | 0.586 | 0.595 | 0.594 | 0.591 | 0.638 | 0.612 | 0.608 |
| <i>Nodal metrics</i> |       |       |       |       |       |       |       |       |       |       |       |       |
| <b>CC (betw.)</b>    | 0.496 | 0.489 | 0.504 | 0.483 | 0.468 | 0.482 | 0.48  | 0.467 | 0.476 | 0.47  | 0.459 | 0.448 |
| <b>PLV (betw.)</b>   | 0.379 | 0.385 | 0.388 | 0.384 | 0.376 | 0.364 | 0.357 | 0.356 | 0.374 | 0.354 | 0.341 | 0.341 |
| <b>PLV (eign.)</b>   | 0.378 | 0.372 | 0.372 | 0.373 | 0.378 | 0.376 | 0.401 | 0.405 | 0.402 | 0.383 | 0.399 | 0.4   |
| <b>AEC (eign.)</b>   | 0.414 | 0.421 | 0.435 | 0.404 | 0.401 | 0.407 | 0.401 | 0.403 | 0.413 | 0.405 | 0.399 | 0.403 |
| <b>AEC (betw.)</b>   | 0.374 | 0.359 | 0.358 | 0.356 | 0.334 | 0.323 | 0.327 | 0.321 | 0.332 | 0.342 | 0.35  | 0.352 |

|                     |       |       |       |       |       |       |       |       |       |       |       |       |
|---------------------|-------|-------|-------|-------|-------|-------|-------|-------|-------|-------|-------|-------|
| <b>ATM (betw.)</b>  | 0.374 | 0.359 | 0.358 | 0.356 | 0.334 | 0.323 | 0.327 | 0.321 | 0.332 | 0.342 | 0.35  | 0.352 |
| <b>ATM (eign.)</b>  | 0.422 | 0.427 | 0.423 | 0.415 | 0.424 | 0.414 | 0.418 | 0.419 | 0.434 | 0.41  | 0.408 | 0.412 |
| <b>PLV (degree)</b> | 0.333 | 0.343 | 0.328 | 0.327 | 0.341 | 0.371 | 0.363 | 0.364 | 0.348 | 0.361 | 0.335 | 0.339 |
| <b>AEC (degree)</b> | 0.298 | 0.308 | 0.289 | 0.289 | 0.297 | 0.299 | 0.31  | 0.298 | 0.32  | 0.284 | 0.27  | 0.262 |
| <b>ATM (degree)</b> | 0.373 | 0.377 | 0.372 | 0.378 | 0.397 | 0.376 | 0.368 | 0.375 | 0.376 | 0.346 | 0.373 | 0.368 |
| <b>CC (degree)</b>  | 0.537 | 0.557 | 0.548 | 0.539 | 0.522 | 0.529 | 0.535 | 0.533 | 0.534 | 0.531 | 0.528 | 0.544 |

Supplementary materials 5: Balanced accuracy for the number of features which contain the best accuracy across different metrics (PLV, AEC, ATM, CC) with SVM.

|                           | n=16      | n=19      | n=20      | n=21      | n=22      | n=25      | n=28      | n=30      | n=31      | n=32      | n=34      | n=35      | n=36      | n=37      | n=39      |
|---------------------------|-----------|-----------|-----------|-----------|-----------|-----------|-----------|-----------|-----------|-----------|-----------|-----------|-----------|-----------|-----------|
| <i>Edge metrics</i>       |           |           |           |           |           |           |           |           |           |           |           |           |           |           |           |
| <b>PLV</b>                | 0.61<br>4 | 0.64      | 0.63<br>5 | 0.63<br>6 | 0.62<br>8 | 0.63<br>4 | 0.63<br>3 | 0.60<br>1 | 0.63<br>1 | 0.64      | 0.65<br>1 | 0.60<br>7 | 0.66<br>5 | 0.64<br>8 | 0.61      |
| <b>AEC</b>                | 0.54<br>1 | 0.57<br>4 | 0.61<br>1 | 0.60<br>1 | 0.61<br>3 | 0.64<br>8 | 0.65<br>2 | 0.66<br>1 | 0.67<br>9 | 0.66<br>5 | 0.66<br>5 | 0.64<br>4 | 0.63<br>2 | 0.65<br>4 | 0.64<br>7 |
| <b>ATM</b>                | 0.53<br>6 | 0.54<br>4 | 0.54<br>1 | 0.53<br>5 | 0.53<br>2 | 0.45<br>4 | 0.54<br>4 | 0.58<br>6 | 0.59<br>7 | 0.60<br>5 | 0.60<br>2 | 0.59<br>6 | 0.59<br>7 | 0.59<br>9 | 0.58      |
| <b>CC</b>                 | 0.50<br>5 | 0.48<br>3 | 0.54<br>3 | 0.53<br>7 | 0.50<br>1 | 0.55<br>8 | 0.57<br>7 | 0.57<br>5 | 0.56<br>8 | 0.58<br>4 | 0.6       | 0.62<br>4 | 0.62<br>1 | 0.62<br>5 | 0.55<br>9 |
| <i>Nodal metrics</i>      |           |           |           |           |           |           |           |           |           |           |           |           |           |           |           |
| <b>AEC (eign. centr.)</b> | 0.48<br>6 | 0.49<br>3 | 0.49<br>5 | 0.48<br>9 | 0.49      | 0.47<br>2 | 0.45<br>9 | 0.45<br>9 | 0.45<br>9 | 0.46<br>1 | 0.46<br>1 | 0.45<br>5 | 0.45<br>4 | 0.45<br>4 | 0.43<br>9 |
| <b>AEC (betw. centr.)</b> | 0.29<br>3 | 0.28<br>8 | 0.29<br>3 | 0.29<br>9 | 0.30<br>4 | 0.31<br>7 | 0.25      | 0.34<br>6 | 0.34<br>2 | 0.34<br>2 | 0.35      | 0.34<br>1 | 0.34<br>1 | 0.33<br>4 | 0.34      |
| <b>CC (betw. centr.)</b>  | 0.48<br>7 | 0.48      | 0.49<br>7 | 0.49      | 0.51<br>2 | 0.49<br>5 | 0.53      | 0.45<br>3 | 0.49<br>2 | 0.49<br>6 | 0.48<br>6 | 0.47<br>9 | 0.49<br>5 | 0.47<br>4 | 0.45<br>7 |
| <b>PLV (betw. centr.)</b> | 0.41<br>2 | 0.42<br>7 | 0.40<br>1 | 0.39<br>4 | 0.37<br>8 | 0.36<br>1 | 0.33      | 0.35<br>8 | 0.34<br>4 | 0.34<br>4 | 0.36<br>3 | 0.35<br>4 | 0.34<br>9 | 0.32<br>8 | 0.36<br>9 |
| <b>PLV (eign. centr.)</b> | 0.39<br>7 | 0.42<br>6 | 0.43<br>2 | 0.42<br>2 | 0.45<br>8 | 0.46<br>7 | 0.45<br>8 | 0.46<br>2 | 0.48<br>7 | 0.48<br>8 | 0.45<br>4 | 0.43<br>6 | 0.40<br>2 | 0.42<br>3 | 0.49<br>2 |
| <b>ATM (betw. centr.)</b> | 0.29<br>3 | 0.28<br>8 | 0.29<br>3 | 0.29<br>9 | 0.30<br>4 | 0.31<br>7 | 0.33<br>9 | 0.34<br>6 | 0.34<br>2 | 0.34<br>2 | 0.35      | 0.34<br>1 | 0.34<br>1 | 0.33<br>4 | 0.34      |
| <b>ATM (Eign. centr.)</b> | 0.47<br>5 | 0.47<br>5 | 0.48<br>3 | 0.48<br>4 | 0.48<br>3 | 0.45<br>4 | 0.46<br>3 | 0.45<br>4 | 0.45<br>6 | 0.45<br>9 | 0.44<br>8 | 0.44<br>9 | 0.44<br>2 | 0.43<br>5 | 0.42<br>3 |
| <b>PLV (degree)</b>       | 0.39<br>1 | 0.36<br>2 | 0.38      | 0.4       | 0.40<br>7 | 0.38<br>9 | 0.38<br>7 | 0.37<br>9 | 0.37<br>7 | 0.37<br>6 | 0.40<br>6 | 0.39<br>8 | 0.34<br>3 | 0.39<br>4 | 0.35<br>3 |
| <b>AEC (degree)</b>       | 0.36<br>5 | 0.34<br>3 | 0.30<br>4 | 0.35      | 0.33<br>7 | 0.36<br>9 | 0.32<br>7 | 0.32<br>6 | 0.32<br>4 | 0.32<br>7 | 0.32<br>3 | 0.32<br>5 | 0.32<br>2 | 0.33<br>4 | 0.32<br>2 |
| <b>ATM (degree)</b>       | 0.31      | 0.31<br>5 | 0.35<br>8 | 0.34<br>1 | 0.32<br>7 | 0.31      | 0.29<br>2 | 0.29<br>3 | 0.31<br>5 | 0.29<br>2 | 0.33<br>1 | 0.32<br>1 | 0.30<br>2 | 0.32<br>7 | 0.31<br>4 |
| <b>CC (degree)</b>        | 0.46<br>1 | 0.41<br>4 | 0.35<br>9 | 0.40<br>4 | 0.39<br>1 | 0.37<br>9 | 0.41<br>9 | 0.38<br>8 | 0.4       | 0.39<br>4 | 0.40<br>8 | 0.38<br>2 | 0.38<br>9 | 0.37<br>9 | 0.37      |

Supplementary materials 6: Features importance. List of associated edges for PLV.

|       |                                                             |
|-------|-------------------------------------------------------------|
| 12-13 | Supplementary Motor area L and Paracentral Lobule L         |
| 46-55 | Frontal Superior R and Postcentral R                        |
| 52-76 | Paracentral Lobule R and Cingulum Medial R                  |
| 12-48 | Supplementary Motor area L and Frontal Inferior Operculum R |
| 26-66 | Cuneus L and Lingual gyrus R                                |
| 37-54 | Cingulum Medial L and Rolandic Operculum R                  |
| 38-77 | Cingulum Posterior L and Cingulum Posterior R               |
| 26-62 | Cuneus L and Occipital Medial R                             |
| 46-57 | Frontal Superior R and Parietal Inferior R                  |
| 46-53 | Frontal Superior R and Precentral R                         |
| 56-76 | Parietal Superior R and Cingulum Medial R                   |
| 21-37 | Precuneus L and Cingulum Medial L                           |
| 54-58 | Rolandic Operculum R and Supra Marginal R                   |
| 37-90 | Cingulum Medial and L Thalamus R                            |
| 26-64 | Cuneus L and Calcarine R                                    |
| 7-46  | Frontal Superior L and Frontal Superior R                   |
| 53-55 | Precentral R and Postcentral R                              |
| 5-85  | Frontal Medial Orbital L and Putamen L                      |
| 12-83 | Supplementary Motor area L and Caudate L                    |
| 58-86 | Supra Marginal R and Putamen R                              |

Supplementary materials 7: Features importance. List of associated edges for AEC.

|        |                                                     |
|--------|-----------------------------------------------------|
| 12-13  | Supplementary Motor area L and Paracentral Lobule L |
| 51-52  | Paracentral Lobule R and Paracentral Lobule R       |
| 46-55  | Frontal Superior R and Postcentral R                |
| 26-66  | Cuneus L and Lingual gyrus R                        |
| 52-76  | Paracentral Lobule R and Cingulum Medial R          |
| 5-85   | Frontal Medial Orbital L and Putamen L              |
| 46-53  | Frontal Superior R and Precentral R                 |
| 53-55  | Precentral R and Postcentral R                      |
| 38-77  | Cingulum Posterior L and Cingulum Posterior R       |
| 54-58  | Rolandic Operculum R and Supra Marginal R           |
| 37-54  | Cingulum Medial L and Rolandic Operculum R          |
| 58-90  | Supra Marginal R and Thalamus R                     |
| 26-62  | Cuneus L and Occipital Medial R                     |
| 53-84  | Precentral R and Caudate R                          |
| 26-64  | Cuneus L and Calcarine R                            |
| 7-46   | Frontal Superior L and Frontal Superior R           |
| 63-111 | Occipital Inferior R and Vermis 4 5                 |
| 54-88  | Rolandic Operculum R Pallidum R                     |
| 13-83  | Paracentral Lobule L and Caudate L                  |
| 53-57  | Precentral R and Parietal Inferior R                |

Supplementary materials 8: Features importance. List of associated edges for ATM.

|        |                                                     |
|--------|-----------------------------------------------------|
| 12-13  | Supplementary Motor area L and Paracentral Lobule L |
| 46-55  | Frontal Superior R and Postcentral R                |
| 67-99  | Fusiform gyrus R and Cerebelum 6 L                  |
| 52-76  | Paracentral Lobule R and Cingulum Medial R          |
| 97-108 | Cerebelum 4 5 L and Cerebelum 10 R                  |
| 53-55  | Precentral R and Postcentral R                      |
| 51-52  | Paracentral Lobule R and Paracentral Lobule R       |
| 46-53  | Frontal Superior R and Precentral R                 |
| 55-90  | Postcentral R and Thalamus R                        |
| 9-16   | Frontal Inferior Operculum L and Postcentral L      |
| 26-63  | Cuneus L and Occipital Inferior R                   |
| 15-16  | Rolandic Operculum L and Postcentral L              |
| 21-37  | Precuneus L and Cingulum Medial L                   |
| 26-66  | Cuneus L and Lingual gyrus R                        |
| 58-90  | Supra Marginal R and Thalamus R                     |
| 7-46   | Frontal Superior L and Frontal Superior R           |

|       |                                          |
|-------|------------------------------------------|
| 12-83 | Supplementary Motor area L and Caudate L |
| 26-62 | Cuneus L and Occipital Medial R          |
| 54-88 | Rolandic Operculum R Pallidum R          |
| 26-64 | Cuneus L and Calcarine R                 |
